# Supplementary material for: Synthesis of a series of Cd(ii) furan-2-thiocarobxylates: unprecedented coordination geometry of a Cd(ii) complex exhibiting catalytic efficiency for the synthesis of 3,4-dihydropyrimidine-2(1H)-one derivatives
Source: Royal Society of Chemistry journal article supplement (doi:10.1039/d3nj04083f), 2024-01-01
Supplement: d3nj04083f1.pdf [file d3nj04083f1.pdf]

# Synthesis of a series of Cd(II) furan-2-thiocarboxylates: Unprecedented coordination geometry of a Cd(II) complex exhibiting catalytic efficiency for the synthesis of 3,4- dihydropyrimidine-2(1*H*)-one derivatives

Krishna Kumar<sup>1</sup>, Akash Shrivastav<sup>1</sup>, Sakshi Choudhary,<sup>2</sup> Angshuman Roy Choudhury<sup>2</sup>, S. Bhattacharya<sup>1,\*</sup>

<sup>1</sup>Department of Chemistry, Institute of Science, Banaras Hindu University, Varanasi-221005, India

<sup>2</sup>Department of Chemical Science, Indian Institute of Science Education and Research, Mohali-140306, India

Email (SB): [s\\_bhatt@bhu.ac.in](mailto:s_bhatt@bhu.ac.in)

## Table of contents:

| S.No. | Content                                                                            | Page No. |
|-------|------------------------------------------------------------------------------------|----------|
| 1.    | <sup>1</sup> H, <sup>13</sup> C, <sup>31</sup> P NMR Spectra of complex 1          | 2-3      |
| 2.    | <sup>1</sup> H, <sup>13</sup> C, <sup>31</sup> P NMR and HRMS Spectra of complex 2 | 3-6      |
| 3.    | <sup>1</sup> H, <sup>13</sup> C, <sup>31</sup> P NMR and HRMS Spectra of complex 3 | 5-8      |
| 4.    | <sup>1</sup> H, <sup>13</sup> C, <sup>31</sup> P NMR Spectra of complex 4          | 9-10     |
| 5.    | Hydrogen bonding interaction in Complex 1                                          | 11       |
| 7.    | Catalytic products and their NMR spectra and some HRMS spectra (5a-5l)             | 11-31    |
| 8.    | Weak interaction shown by Complex 1, 2 and 3                                       | 32-33    |
| 9.    | Geometrical interpretation of Cd(II) complexes                                     | 34       |

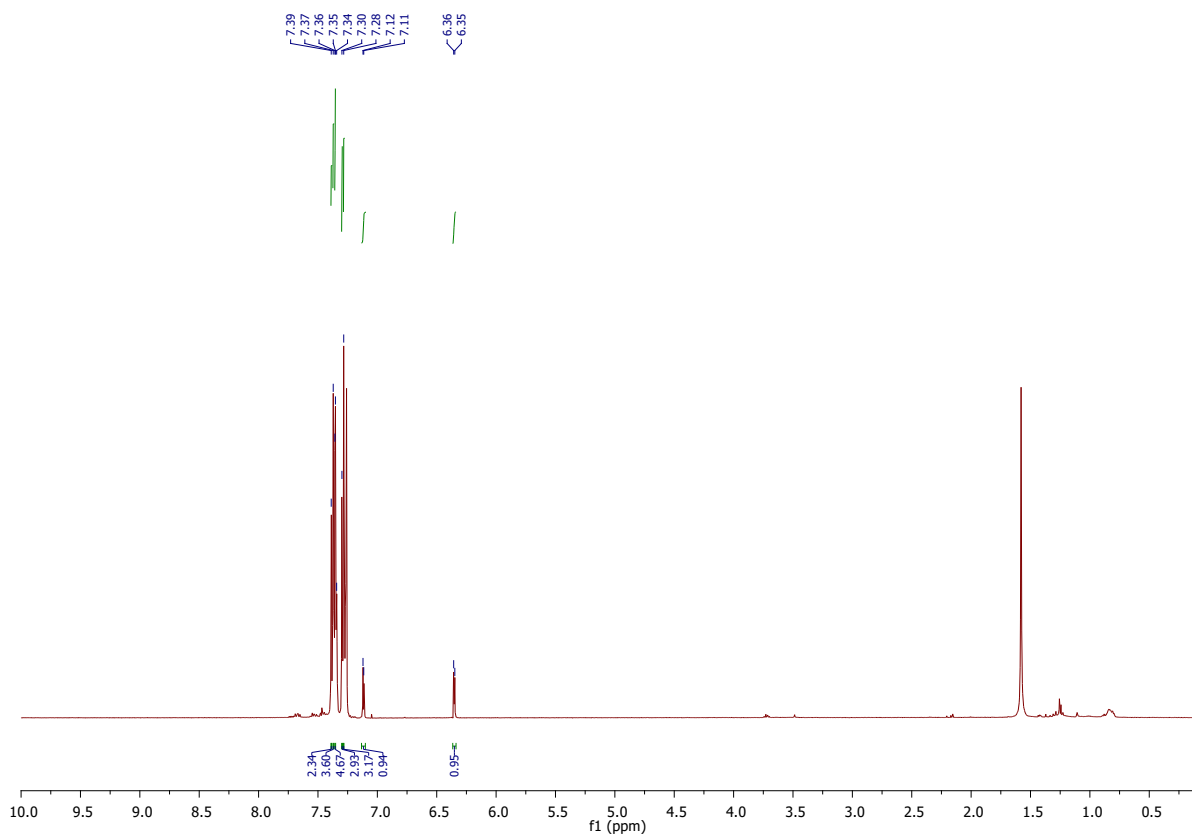

**<sup>1</sup>H NMR spectrum of 1 [(PPh<sub>3</sub>)Cd(SCOf)<sub>2</sub>]**

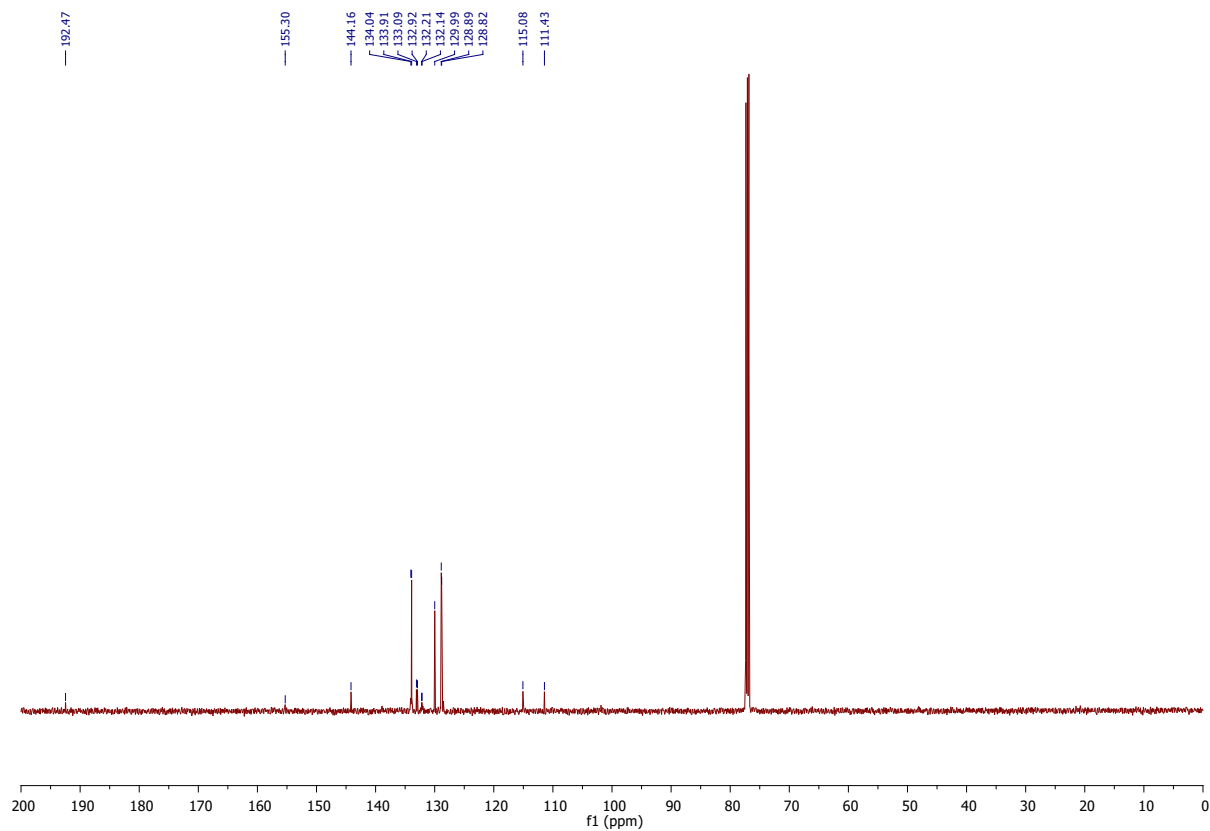

**<sup>13</sup>C NMR spectrum of 1 [(PPh<sub>3</sub>)Cd(SCOf)<sub>2</sub>]**

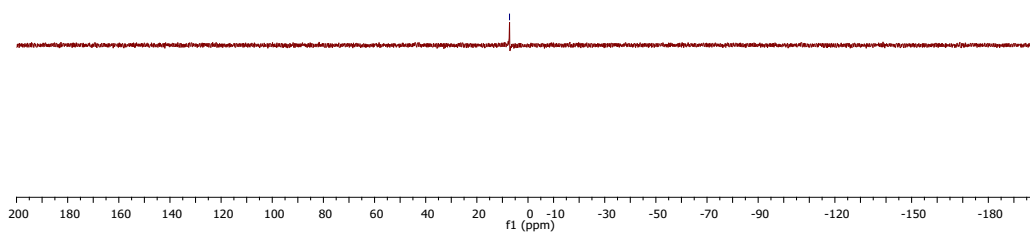

$^{31}\text{P}$  NMR spectrum of 1 [(PPh<sub>3</sub>)Cd(SCOf)<sub>2</sub>]

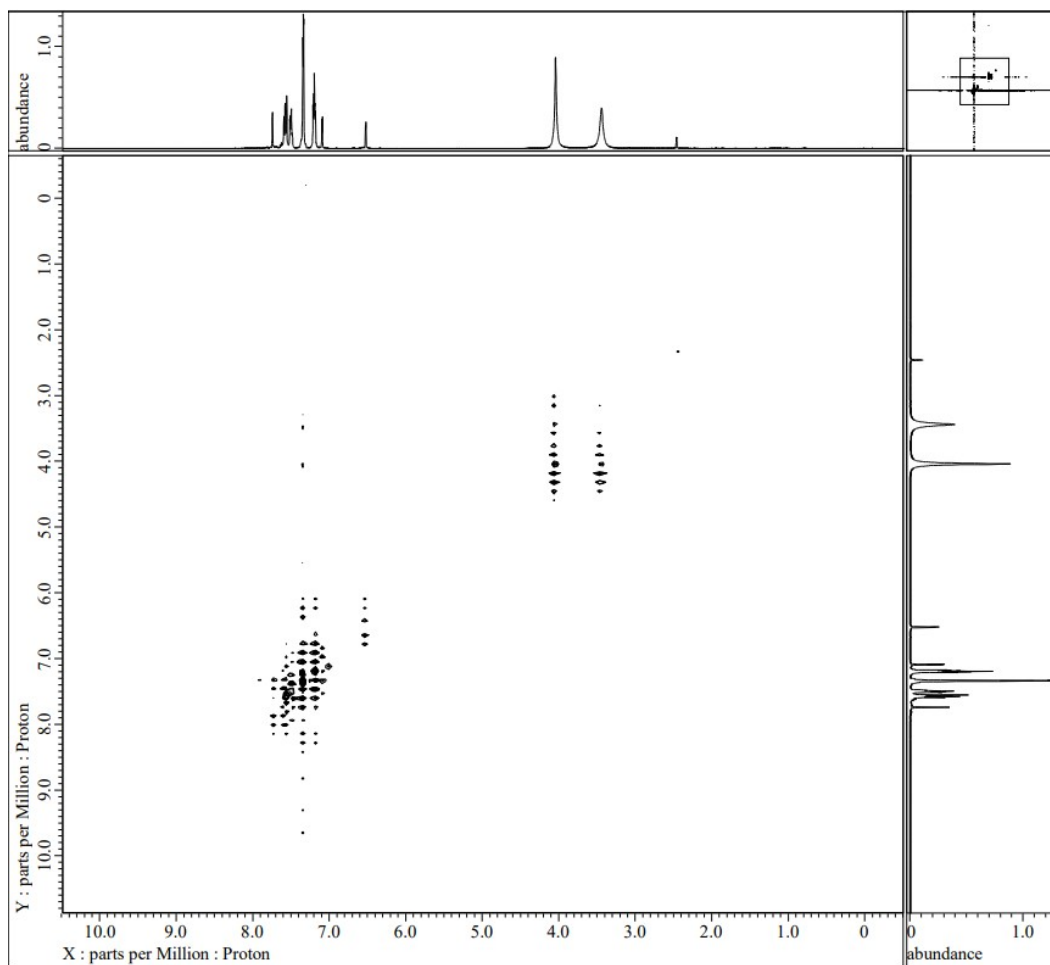

2D NOESY NMR spectrum of 1 [(PPh<sub>3</sub>)Cd(SCOf)<sub>2</sub>]

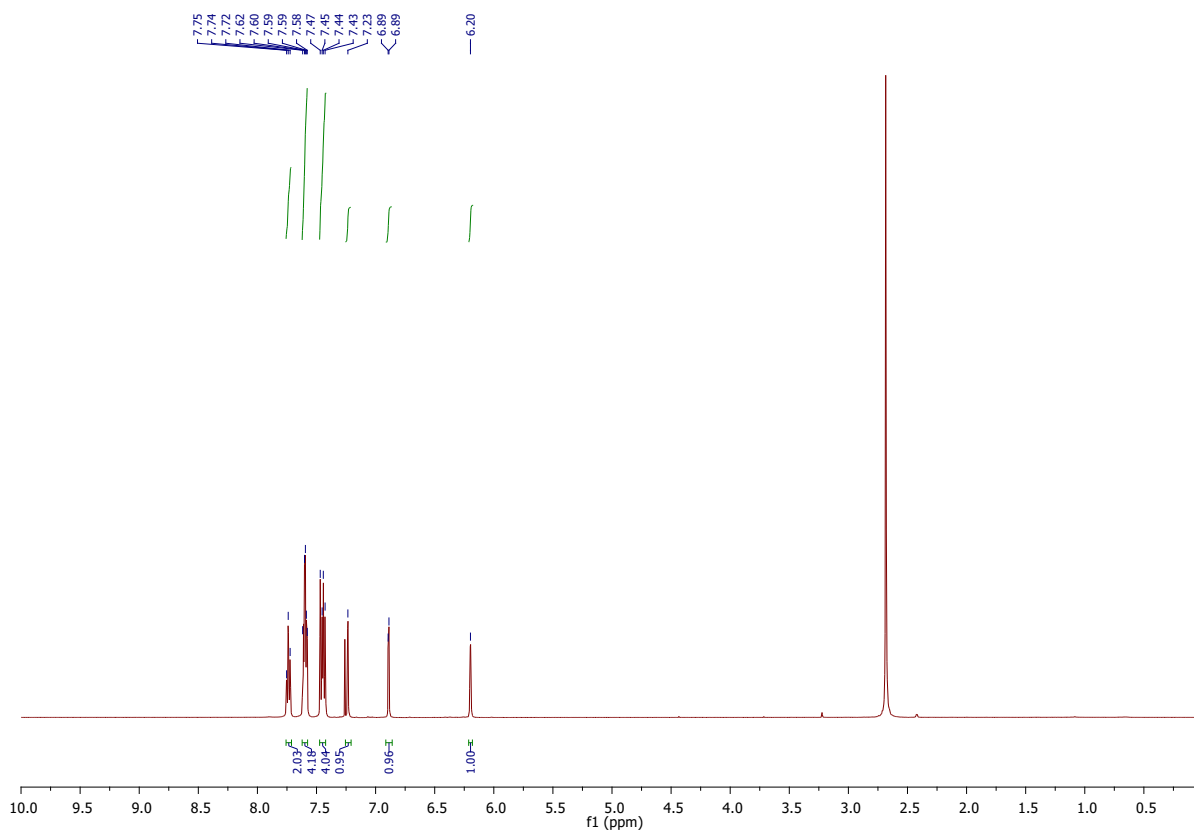

**$^1\text{H}$  NMR spectrum of 2  $[\text{PPh}_4]_2[\text{Cd}(\text{SCOf})_2(\mu\text{-Br})_2]$**

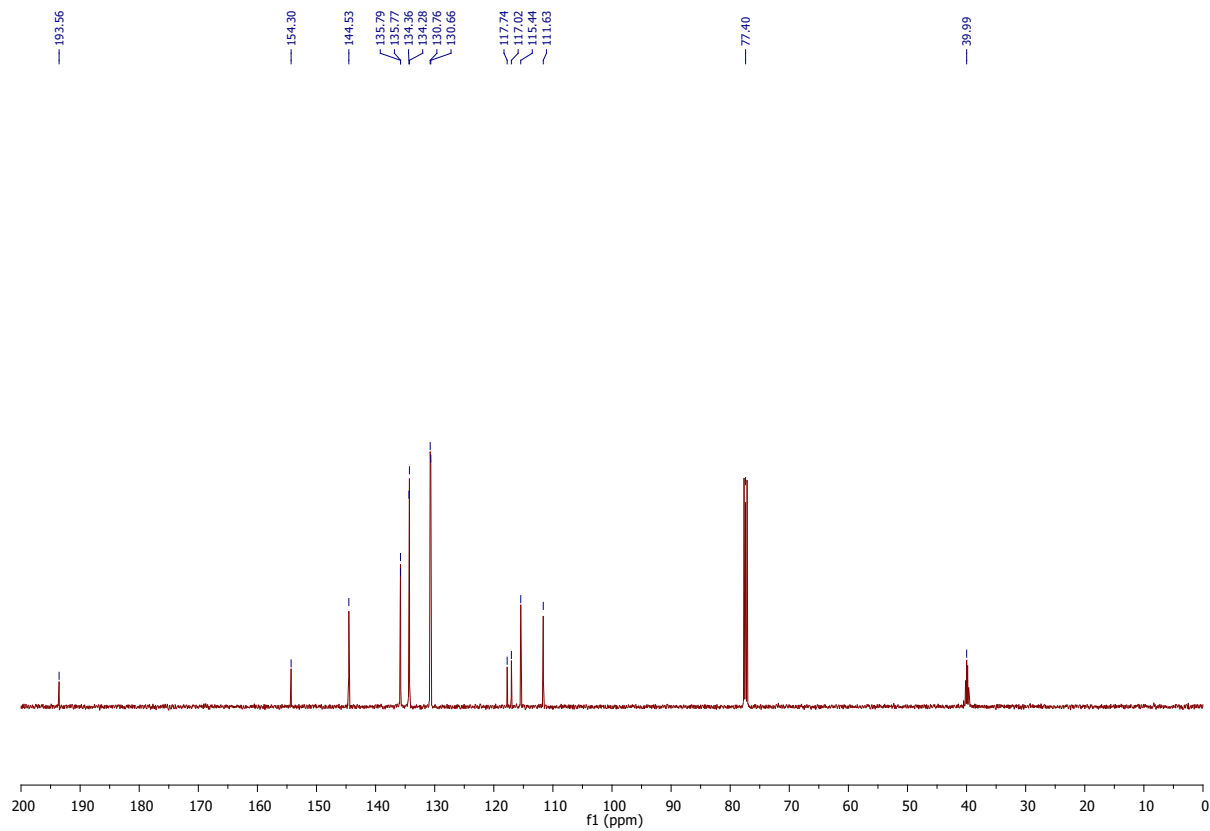

**$^{13}\text{C}$  NMR spectrum of 2  $[\text{PPh}_4]_2[\text{Cd}(\text{SCOf})_2(\mu\text{-Br})_2]$**

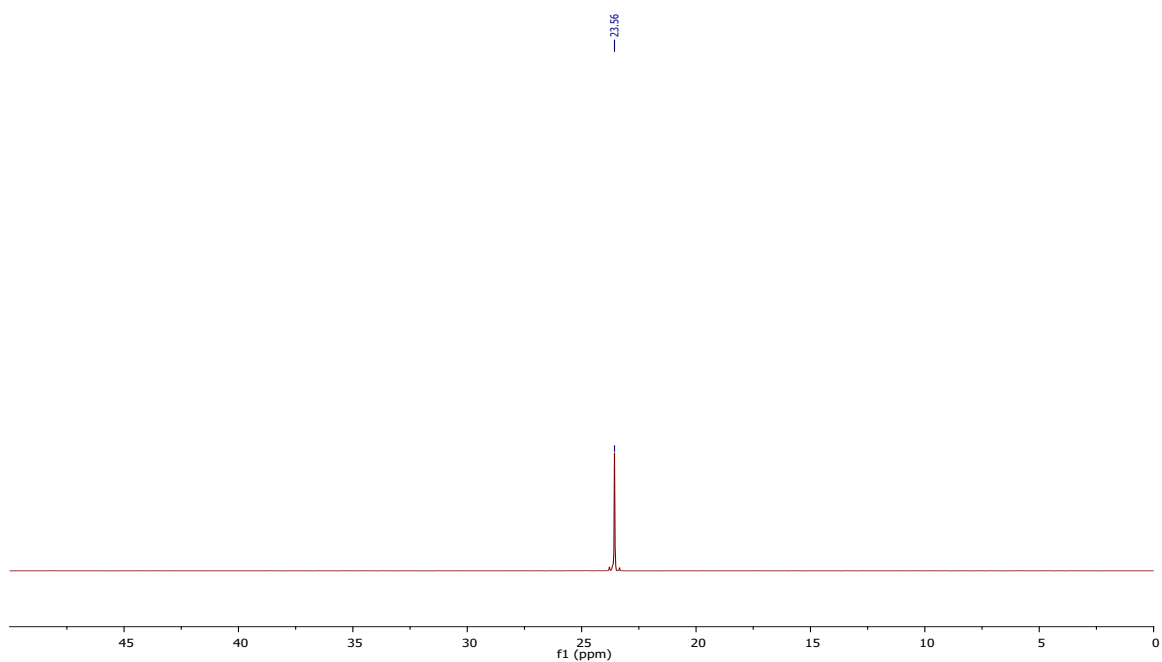

**$^{31}\text{P}$  NMR spectrum of 2  $[\text{PPh}_4]_2[\text{Cd}(\text{SCOf})_2(\mu\text{-Br})_2]$**

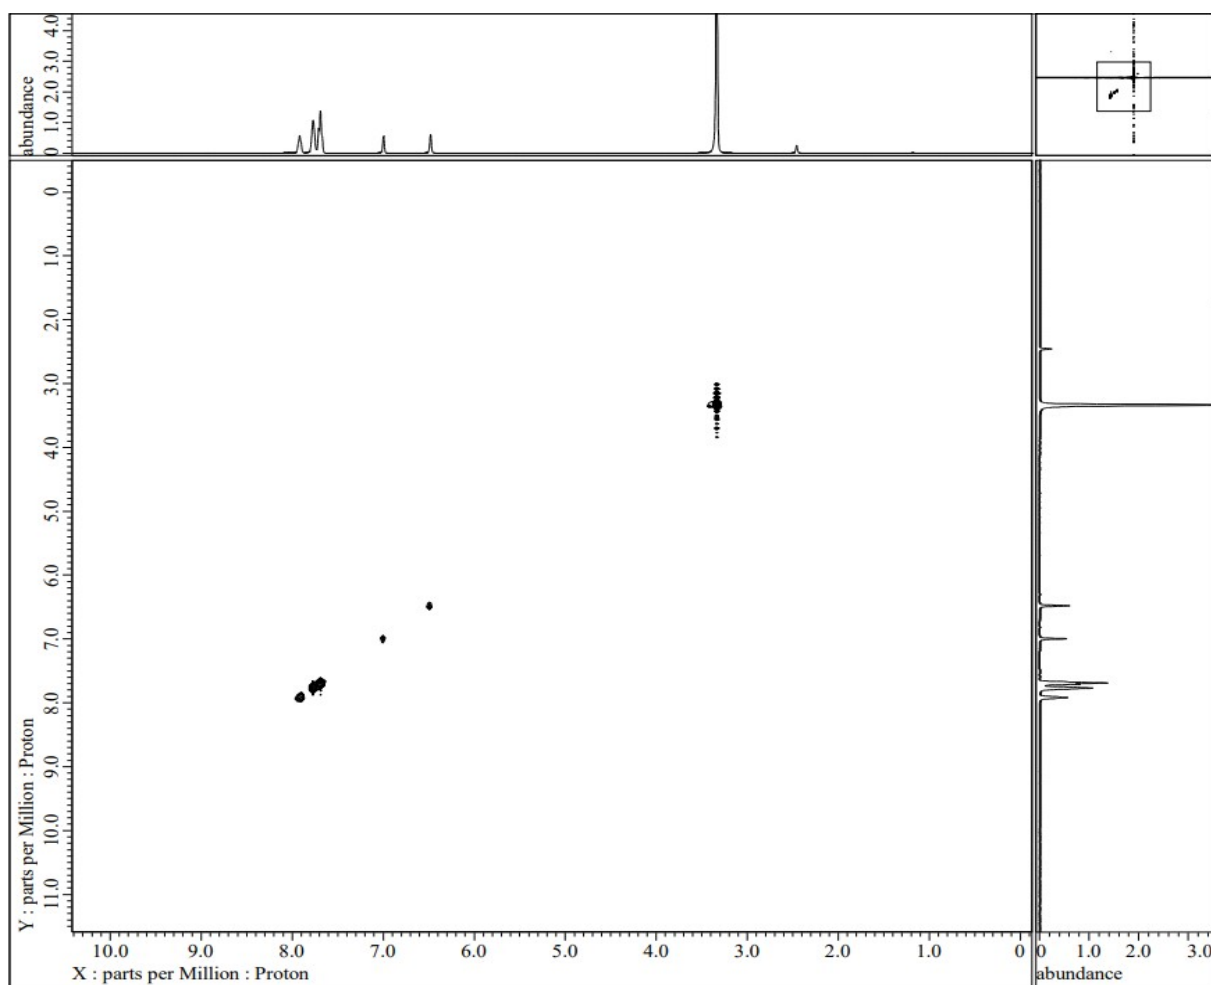

**2D NOESY NMR spectrum of 2  $[\text{PPh}_4]_2[\text{Cd}(\text{SCOf})_2(\mu\text{-Br})_2]$**



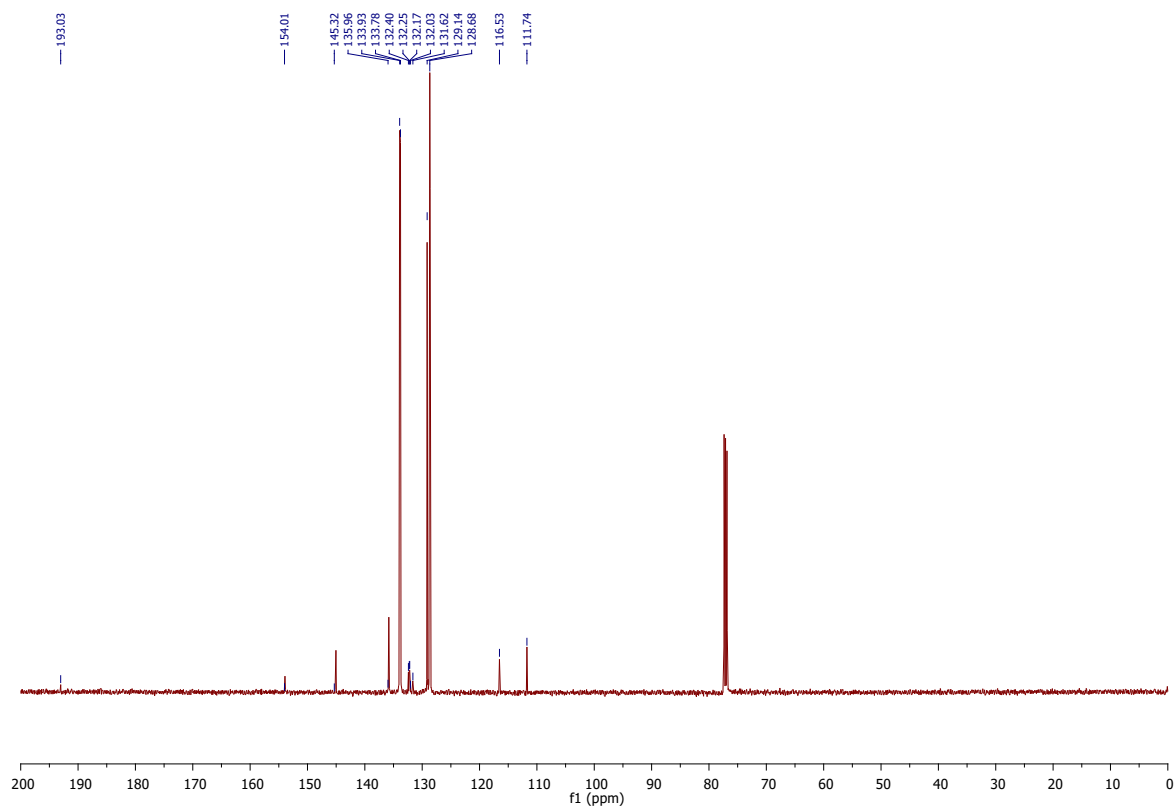

**<sup>13</sup>C NMR spectrum of 3 [(PPh<sub>3</sub>)<sub>2</sub>Ag(μ<sub>2</sub>-SCOf)<sub>2</sub>Cd(SCOf)]**

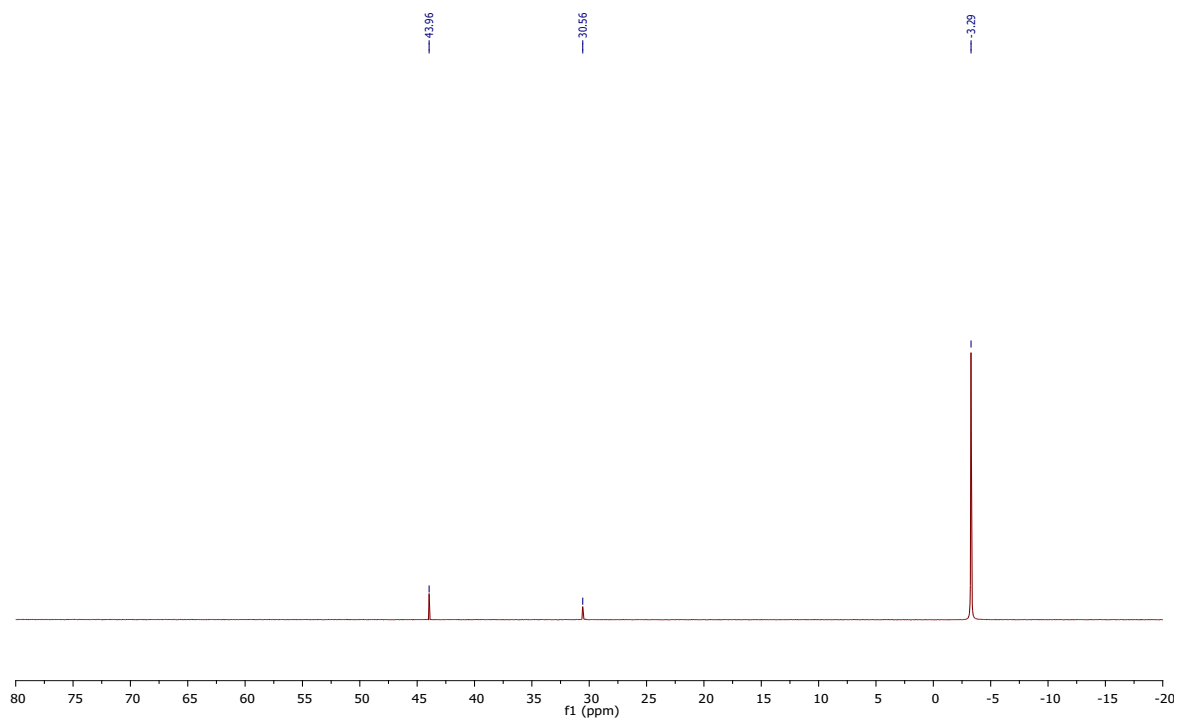

**<sup>31</sup>P NMR spectrum of 3 [(PPh<sub>3</sub>)<sub>2</sub>Ag(μ<sub>2</sub>-SCOf)<sub>2</sub>Cd(SCOf)]**

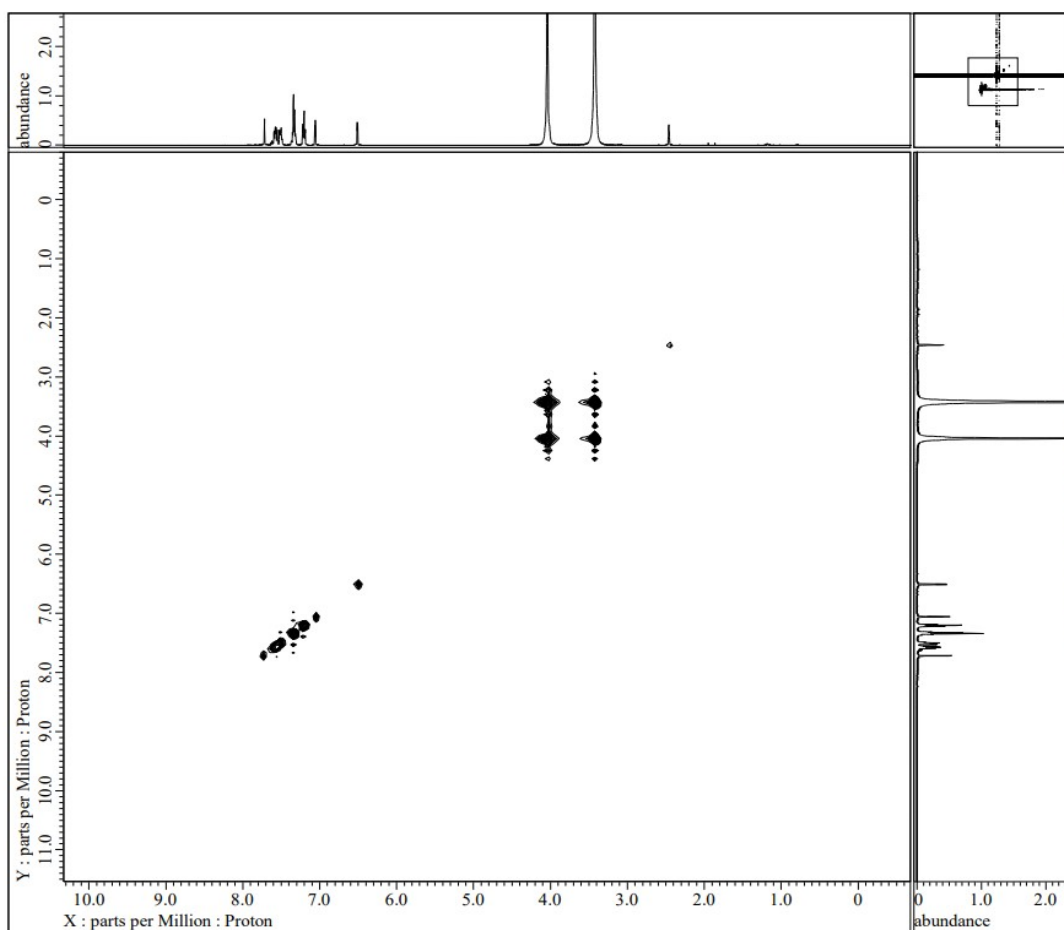

**2D NOESY NMR spectrum of 3 [(PPh<sub>3</sub>)<sub>2</sub>Ag(μ<sub>2</sub>-SCOf)<sub>2</sub>Cd(SCOf)]**

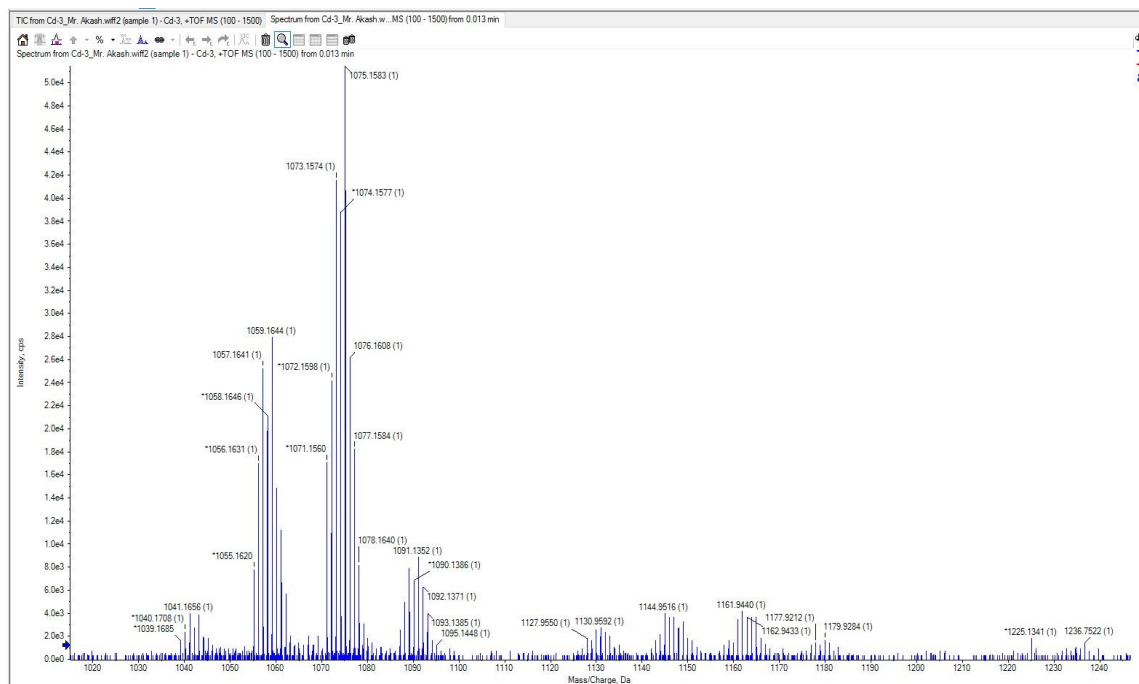

**HRMS Spectrum of Complex 3**



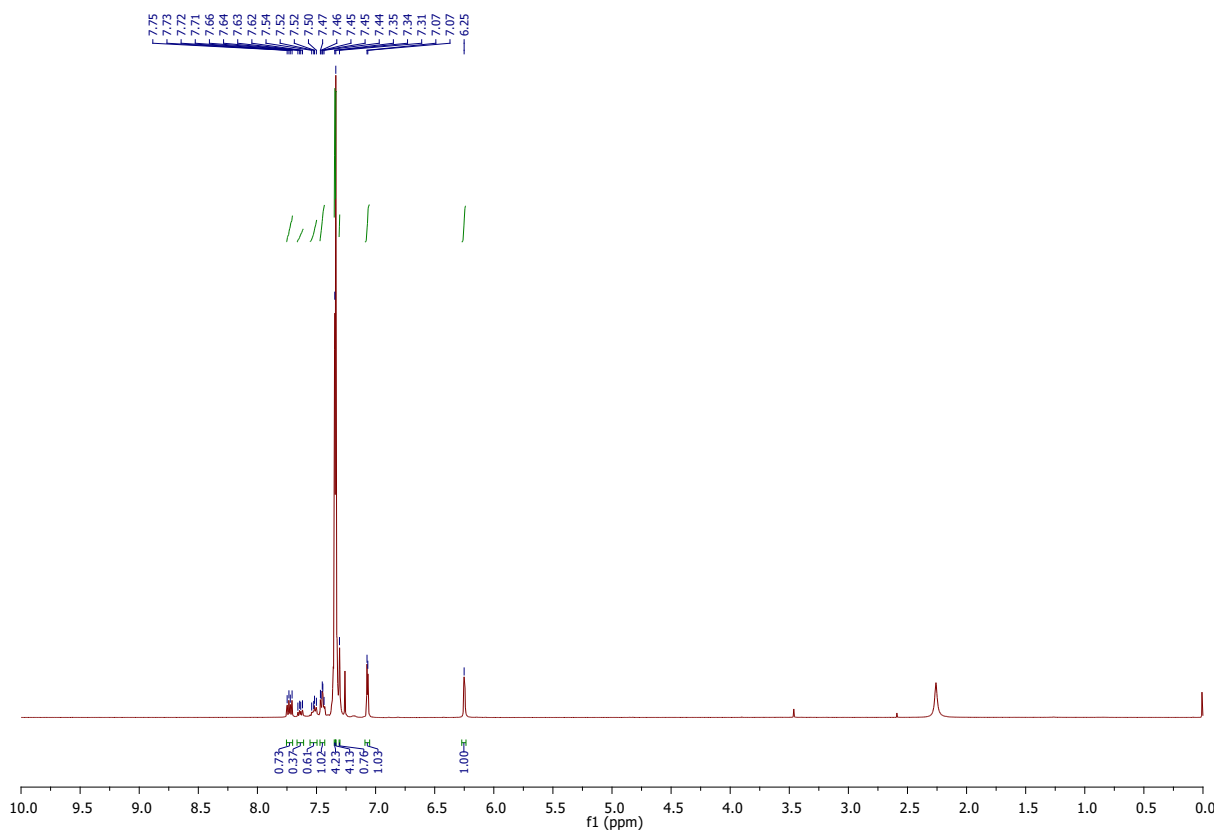

**$^1\text{H}$  NMR spectrum of  $4 \text{Na}_2[(\text{PPh}_3)\text{Cd}(\text{MeOH})(\text{SCOf})_3]_2$**

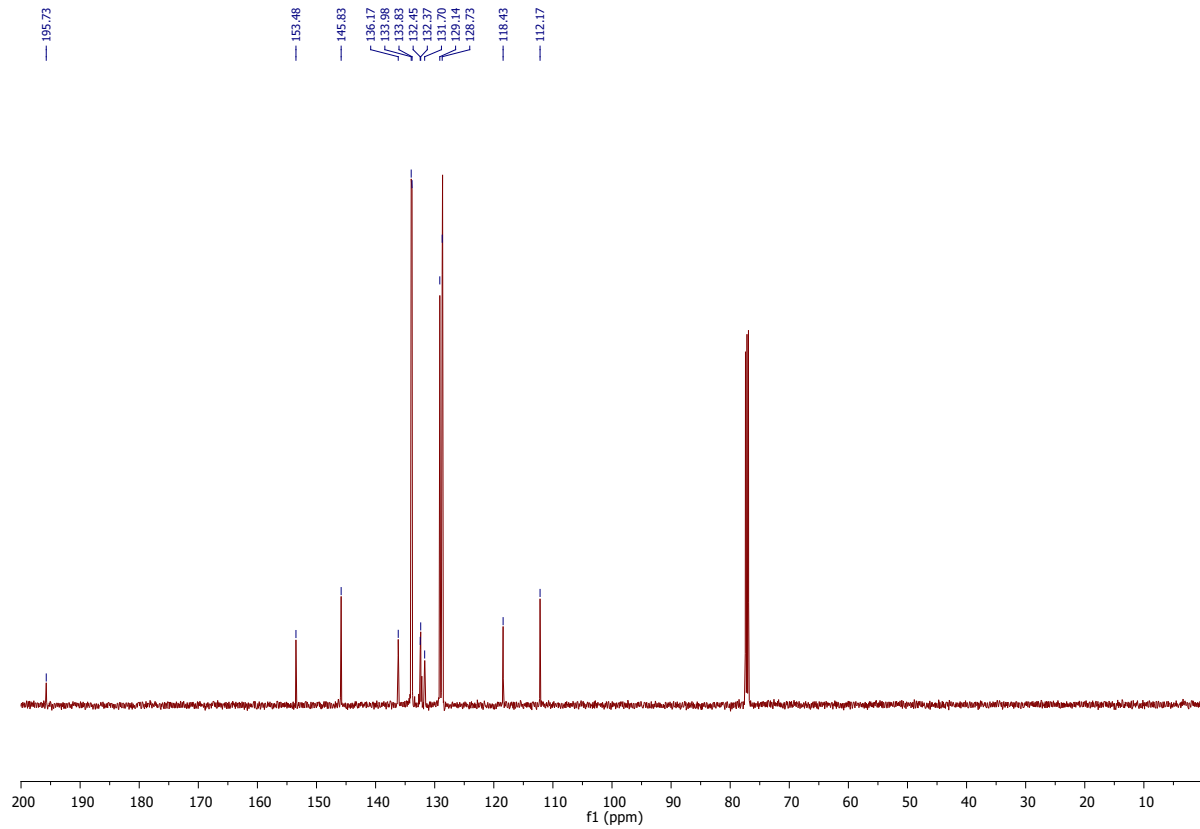

**$^{13}\text{C}$  NMR spectrum of  $4 \text{Na}_2[(\text{PPh}_3)\text{Cd}(\text{MeOH})(\text{SCOf})_3]_2$**

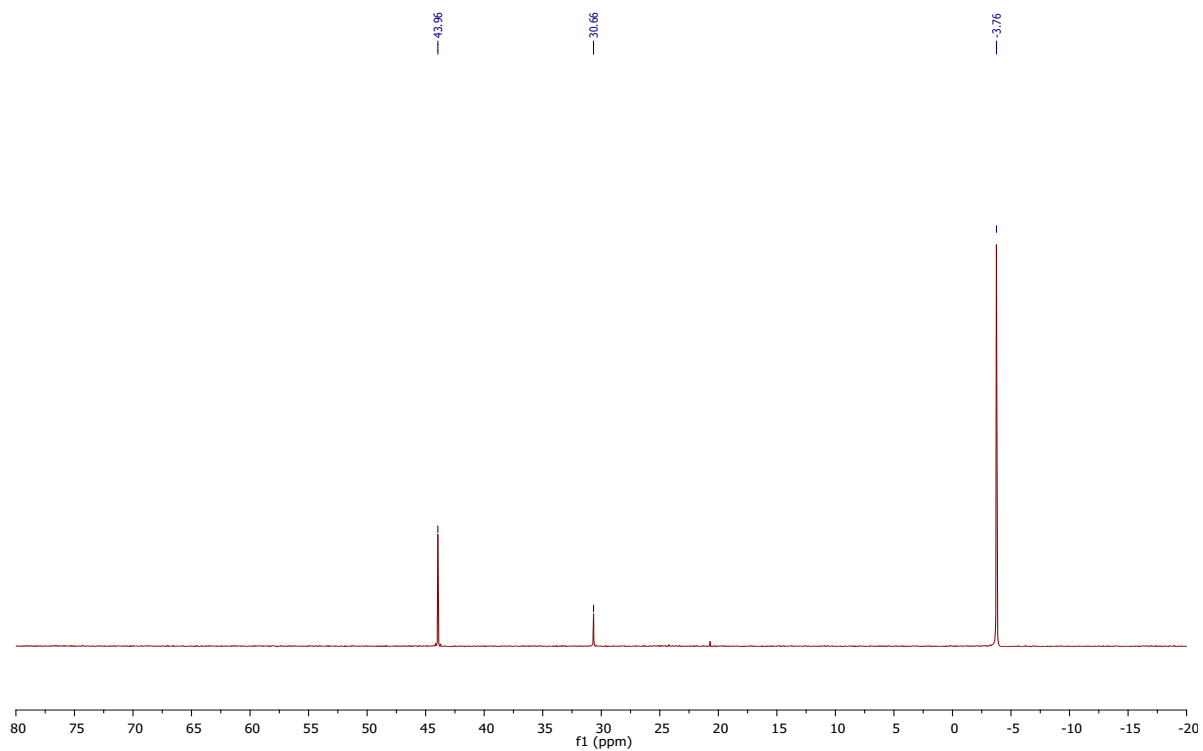

$^{31}\text{P}$  NMR spectrum of  $4 \text{Na}_2[(\text{PPh}_3)\text{Cd}(\text{MeOH})(\text{SCOf})_3]_2$

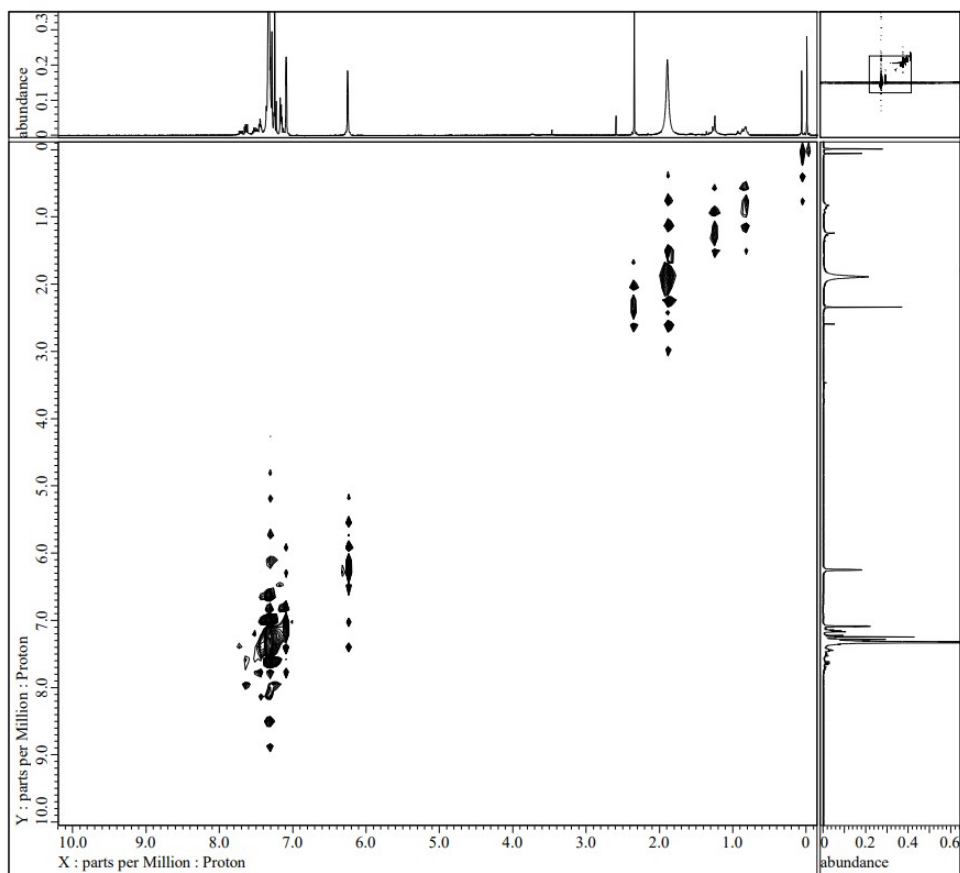

2D NOESY NMR spectrum of  $4 \text{Na}_2[(\text{PPh}_3)\text{Cd}(\text{MeOH})(\text{SCOf})_3]_2$

## Hydrogen bond for complex 1

| D   | H   | A               | d(D-H)/Å | d(H-A)/Å | d(D-A)/Å  | D-H-A/° |
|-----|-----|-----------------|----------|----------|-----------|---------|
| C36 | H36 | S2              | 0.93     | 2.88     | 3.698 (5) | 147.0   |
| C12 | H12 | O1              | 0.93     | 2.64     | 3.429 (6) | 143.1   |
| C40 | H40 | S1 <sup>1</sup> | 0.93     | 2.83     | 3.591 (5) | 139.8   |
| C22 | H22 | O3              | 0.93     | 2.53     | 3.404 (5) | 156.3   |

<sup>1</sup>I/2+X,+Y,3/2-Z

## Catalytic products and their NMR spectra

### Ethyl-6-methyl-2-oxo-4-phenyl-1,2,3,4-tetrahydropyrimidine-5-carboxylate (5a)

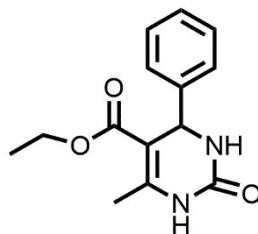

M.F. C<sub>14</sub>H<sub>16</sub>N<sub>2</sub>O<sub>3</sub> (260.29). Yield: (0.244 g, 94%). White powder. <sup>1</sup>H NMR (500 MHz, DMSO-d<sub>6</sub>, ppm) δ 9.18 (s, 1H, NH), 7.73 (s, 1H, NH), 7.32 (t, J = 7.5 Hz 2H), 7.23(m, 3H), 5.15 (d, J = 3 Hz, 1H), 3.96-4.00 (m, 2H), 2.24 (s, 3H), 1.09 (t, J= 7.5Hz, 3H); <sup>13</sup>C NMR (125 MHz, DMSO-d<sub>6</sub>, ppm) δ 165.9, 152.7, 148.9, 145.4, 128.9, 127.8, 126.8, 99.9, 59.7,54.5, 18.3, 14.6; HRMS (ESI): calcd. for C<sub>14</sub>H<sub>16</sub>N<sub>2</sub>O<sub>3</sub> [M + H]<sup>+</sup> 261.124, found 261.124.

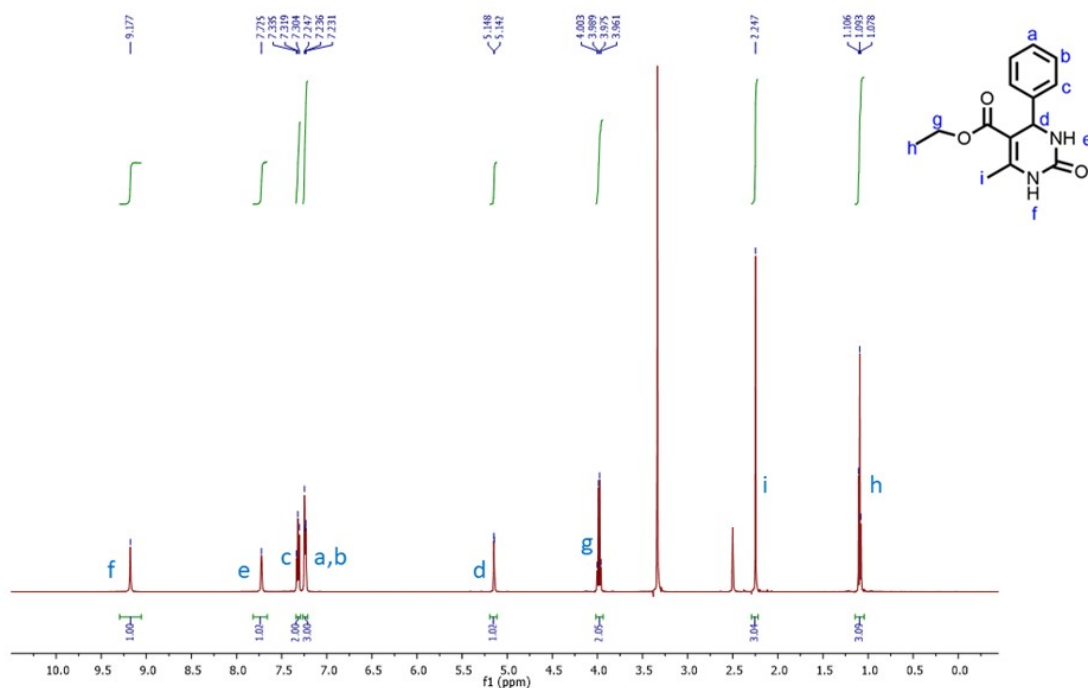

## $^1\text{H}$ NMR spectrum of 5a

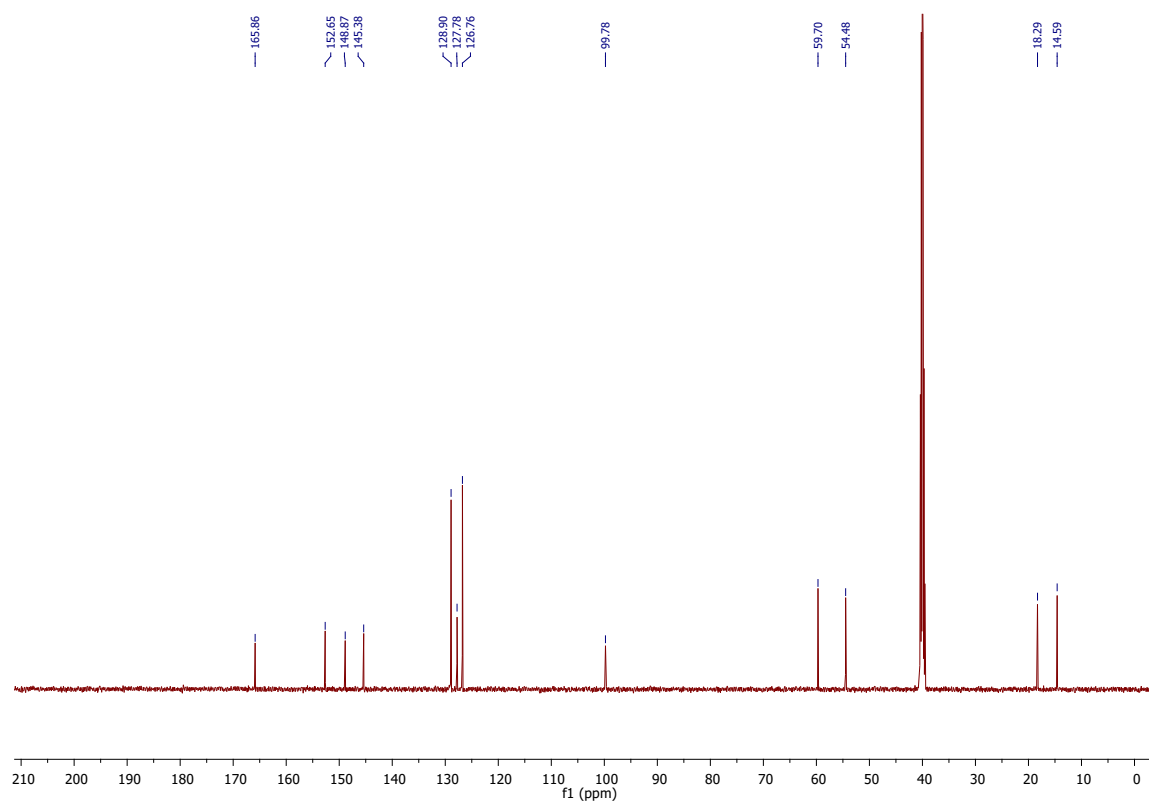

## $^{13}\text{C}$ NMR spectrum of 5a

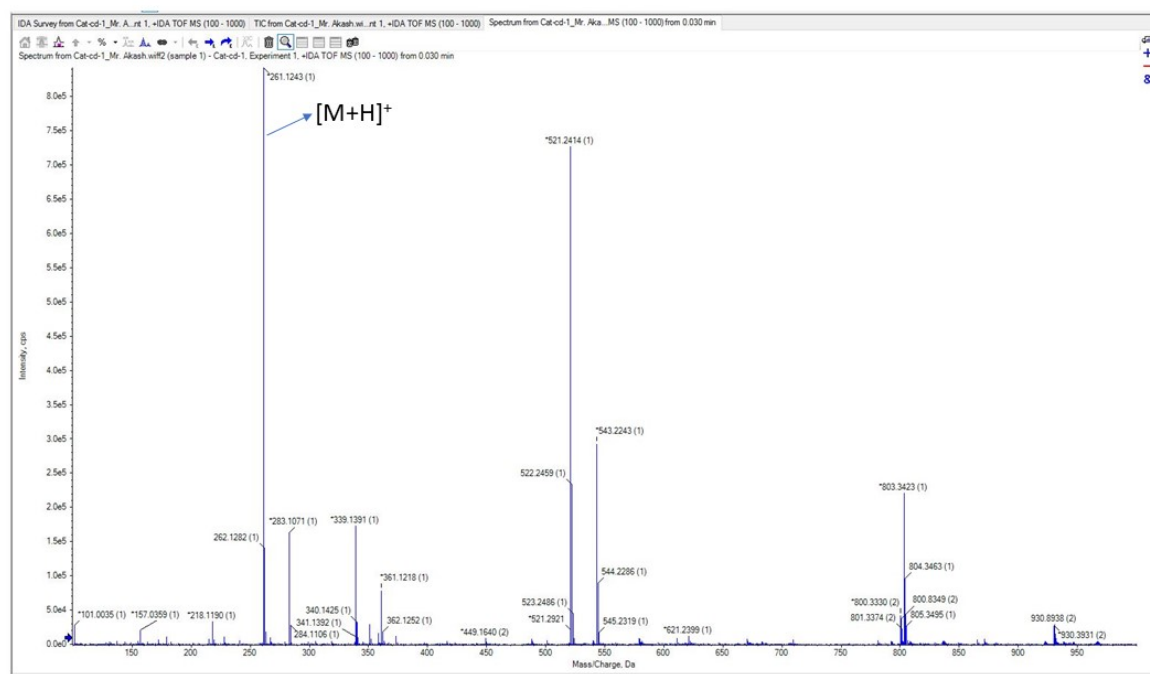

## HRMS spectrum of 5a

## Ethyl-6-methyl-2-oxo-4-(p-tolyl)-1,2,3,4-tetrahydropyrimidine-5-carboxylate(5b)

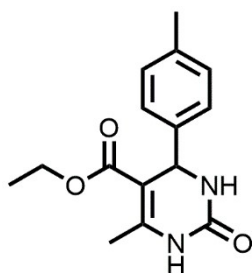

M.F.  $C_{15}H_{18}N_2O_3$  (274.32). Yield: (0.252 g, 92%). White powder.  $^1H$  NMR (500 MHz, DMSO- $d_6$ , ppm)  $\delta$  9.10 (s, 1H, NH), 7.63 (s, 1H, NH), 7.07 (d, 4H), 5.1 (s, 1H), 3.91-3.95 (m, 2H), 2.21 (s, 3H), 2.19 (s, 3H), 1.05 (t,  $J=7$ Hz, 3H);  $^{13}C$  NMR (125 MHz, DMSO- $d_6$ , ppm)  $\delta$  165.9, 152.7, 148.7, 142.5, 136.9, 129.4, 126.7, 99.3, 59.7, 54.1, 21.2, 18.3, 14.6; HRMS (ESI): calcd. for  $C_{15}H_{18}N_2O_3$   $[M + H]^+$  275.139, found 275.139.

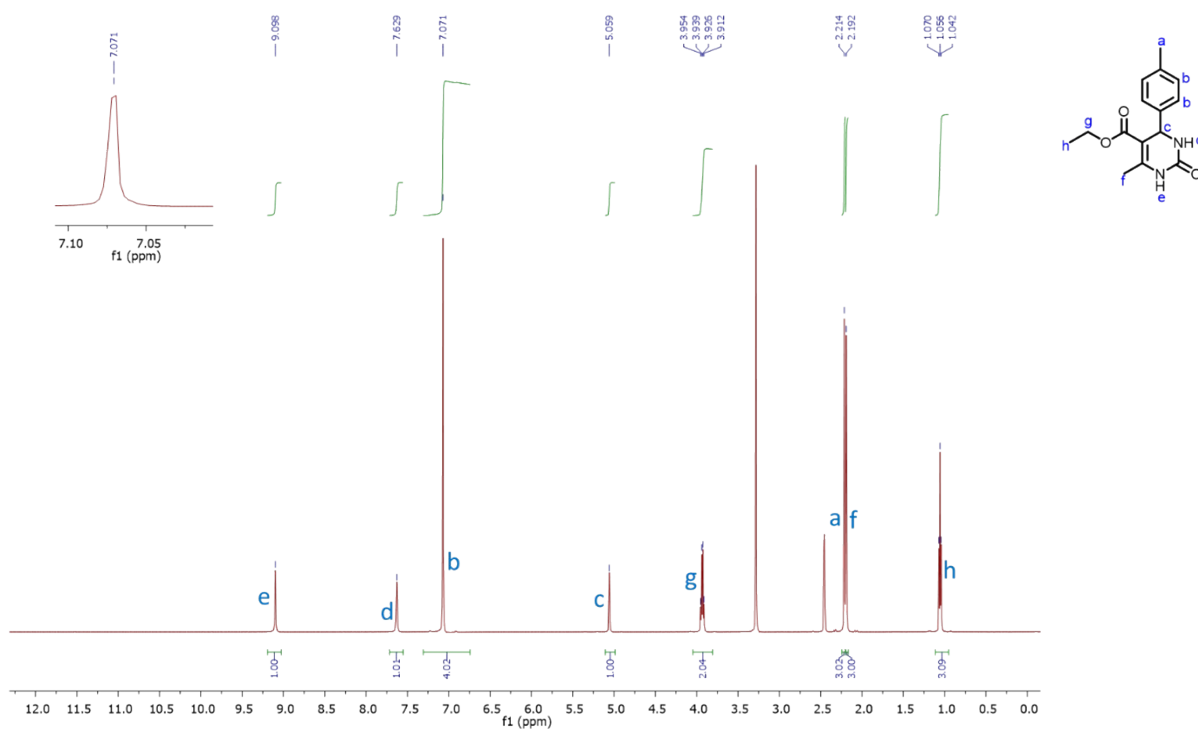

$^1H$  NMR spectrum of 5b

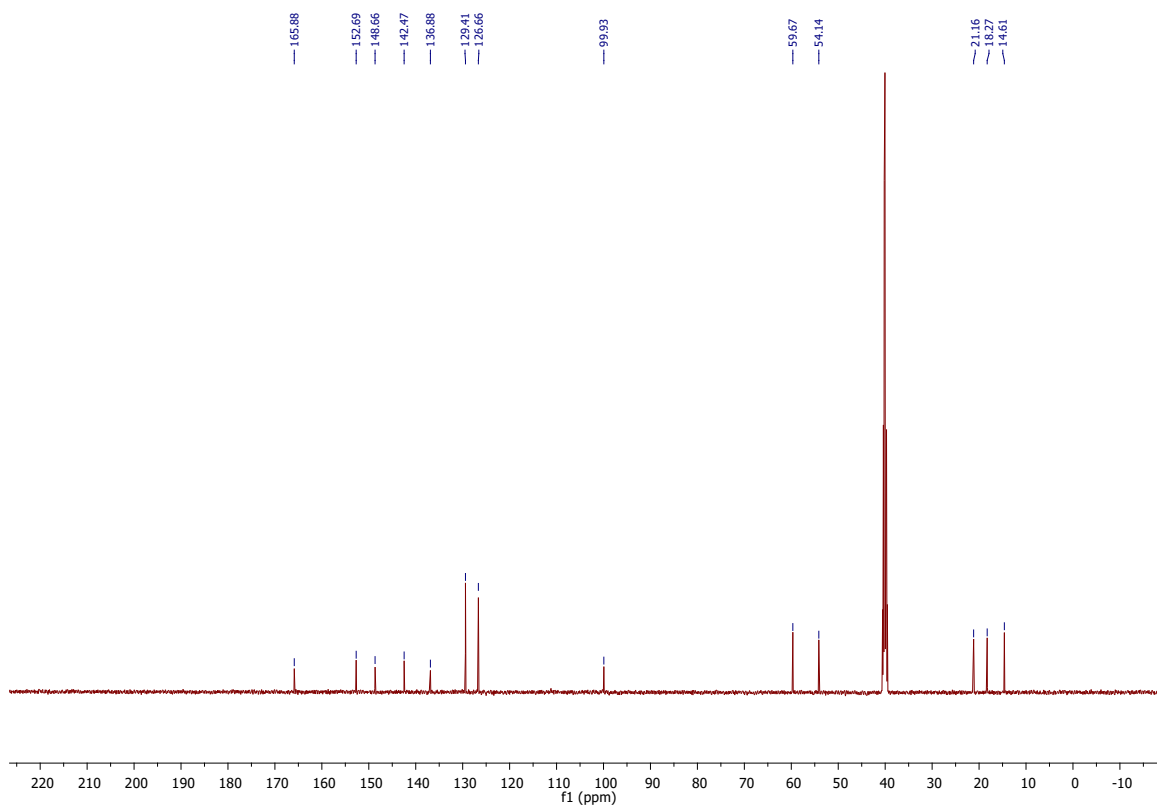

**13C NMR spectrum of 5b**

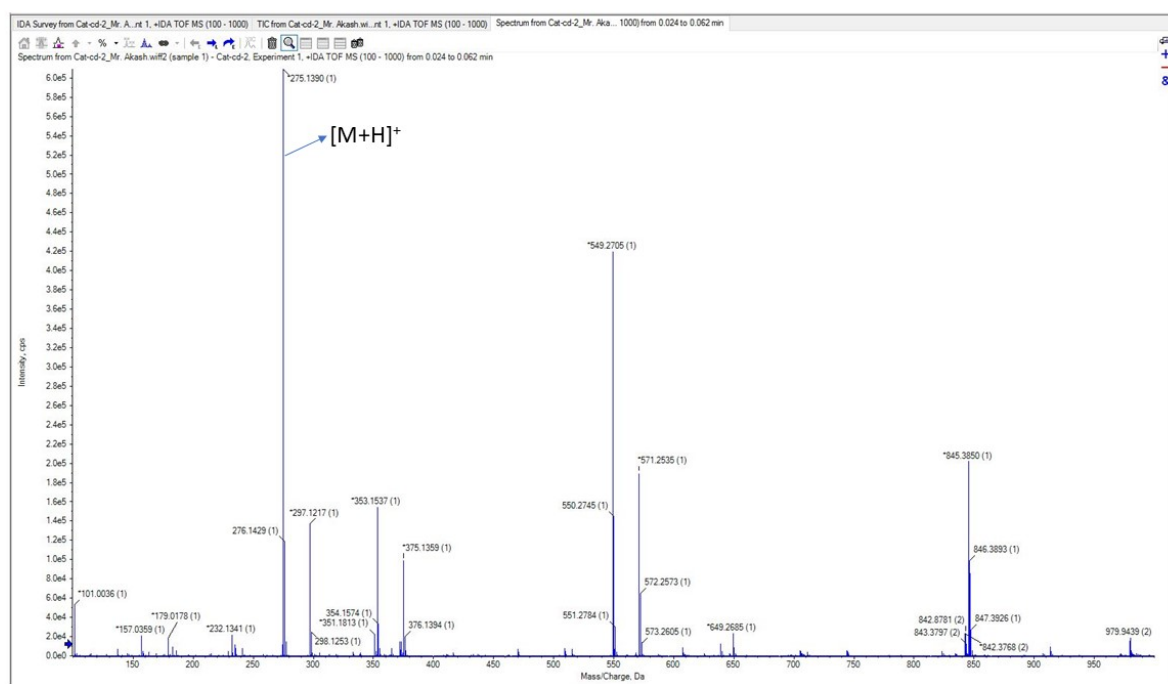

**HRMS spectrum of 5b**

**Ethyl-4-(4-methoxyphenyl)-6-methyl-2-oxo-1,2,3,4-tetrahydropyrimidine-5-carboxylate(5c)**

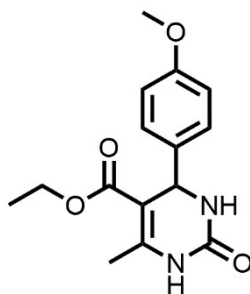

M.F. C<sub>15</sub>H<sub>18</sub>N<sub>2</sub>O<sub>4</sub> (290.32). Yield: (0.261 g, 90%). White powder. <sup>1</sup>H NMR (500 MHz, DMSO-d<sub>6</sub>, ppm) δ 9.13 (s, 1H, NH), 7.65 (s, 1H, NH), 7.14 (d, J = 8 Hz 2H), 6.87 (d, J = 8.5Hz, 2H) 5.09 (s, 2H), 3.95-3.99 (m, 2H), 3.72(s,3H), 2.24 (s, 3H), 1.10 (t, J= 7 Hz, 3H); <sup>13</sup>C NMR (125 MHz, DMSO-d<sub>6</sub>, ppm) δ 165.9, 158.9, 152.7, 148.5, 137.6, 127.9, 114.2,100.1, 59,7,55.6, 18.3, 14.6; HRMS (ESI): calcd. for C<sub>15</sub>H<sub>18</sub>N<sub>2</sub>O<sub>4</sub> [M + H]<sup>+</sup> 291.134, found 291.135.

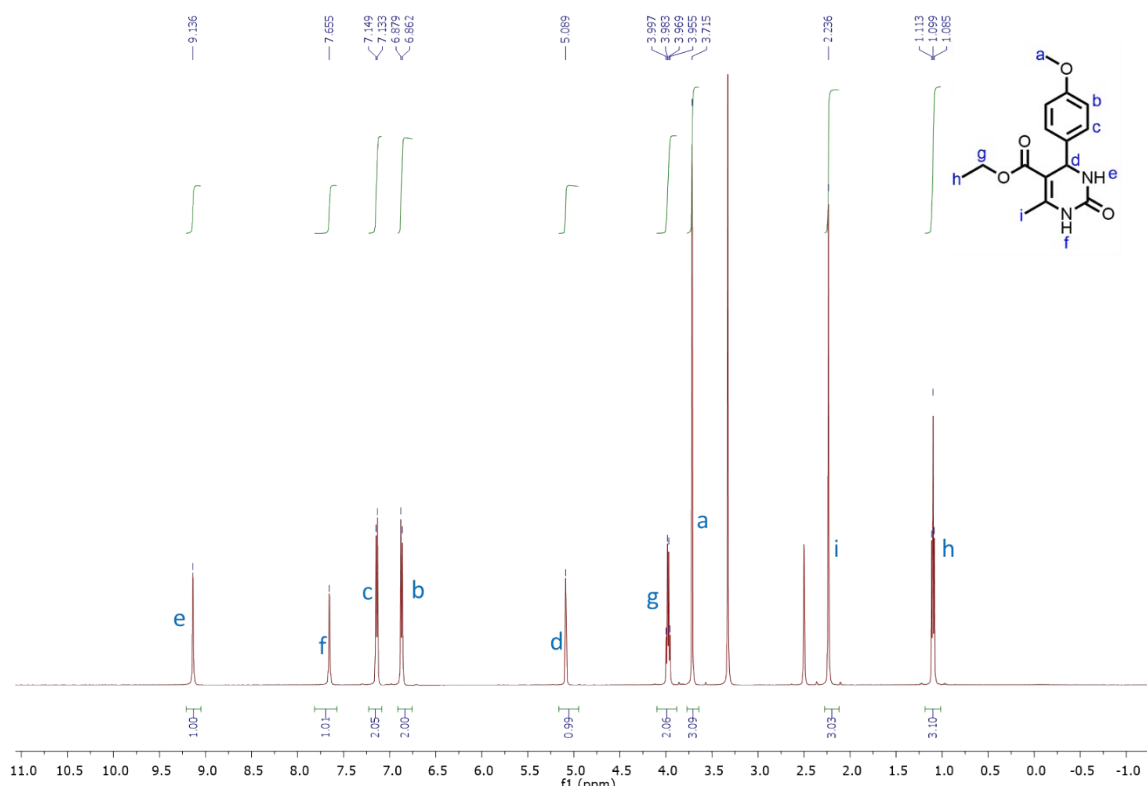

**<sup>1</sup>H NMR spectrum of 5c**

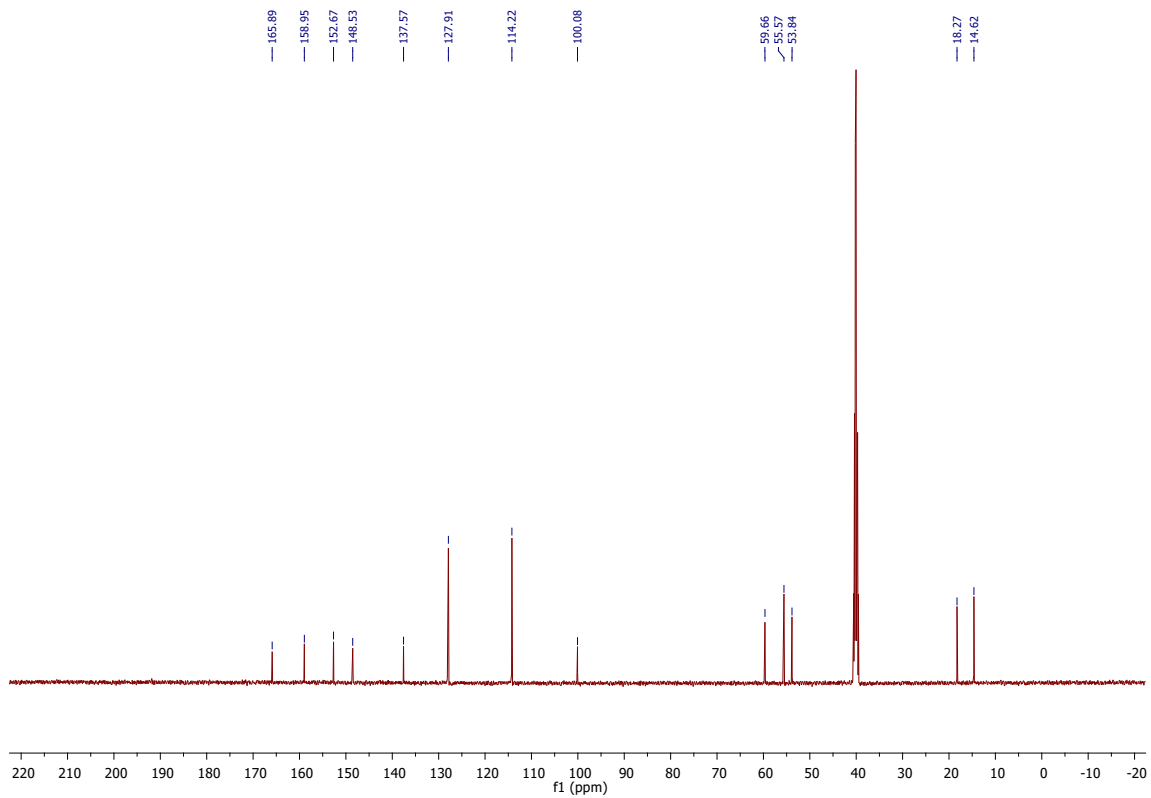

**<sup>13</sup>C NMR spectrum of 5c**

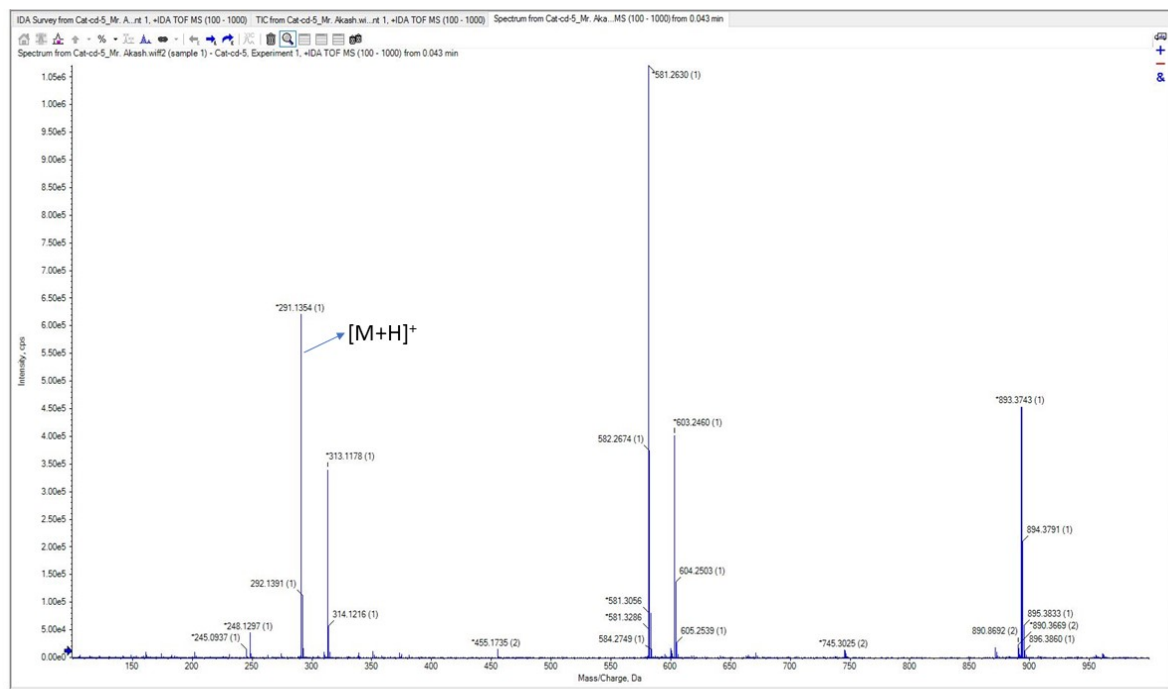

**HRMS spectrum of 5c**



**Ethyl-4-(4-chlorophenyl)-6-methyl-2-oxo-1,2,3,4-tetrahydropyrimidine-5-carboxylate(5d)**

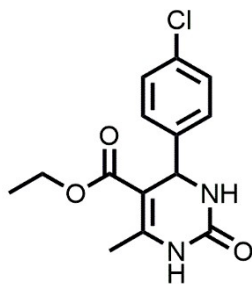

M.F.  $C_{14}H_{15}N_2O_4Cl$  (294.74). Yield: (0.268 g, 91%). White powder.  $^1H$  NMR (500 MHz, DMSO- $d_6$ , ppm)  $\delta$  9.23 (s, 1H, NH), 7.76 (s, 1H, NH), 7.39 (d,  $J = 8.5$  Hz 2H), 7.24 (d,  $J = 7$ Hz, 2H) 5.14 (s, 2H), 3.96-4.00 (m, 2H), 2.24 (s, 3H), 1.09 (t,  $J = 6.5$  Hz, 3H);  $^{13}C$  NMR (125 MHz, DMSO- $d_6$ , ppm)  $\delta$  165.8, 152.4, 149.1, 144.4, 132.3, 128.9, 128.7, 126.8, 99.6, 59.7, 54.0, 18.3, 14.6

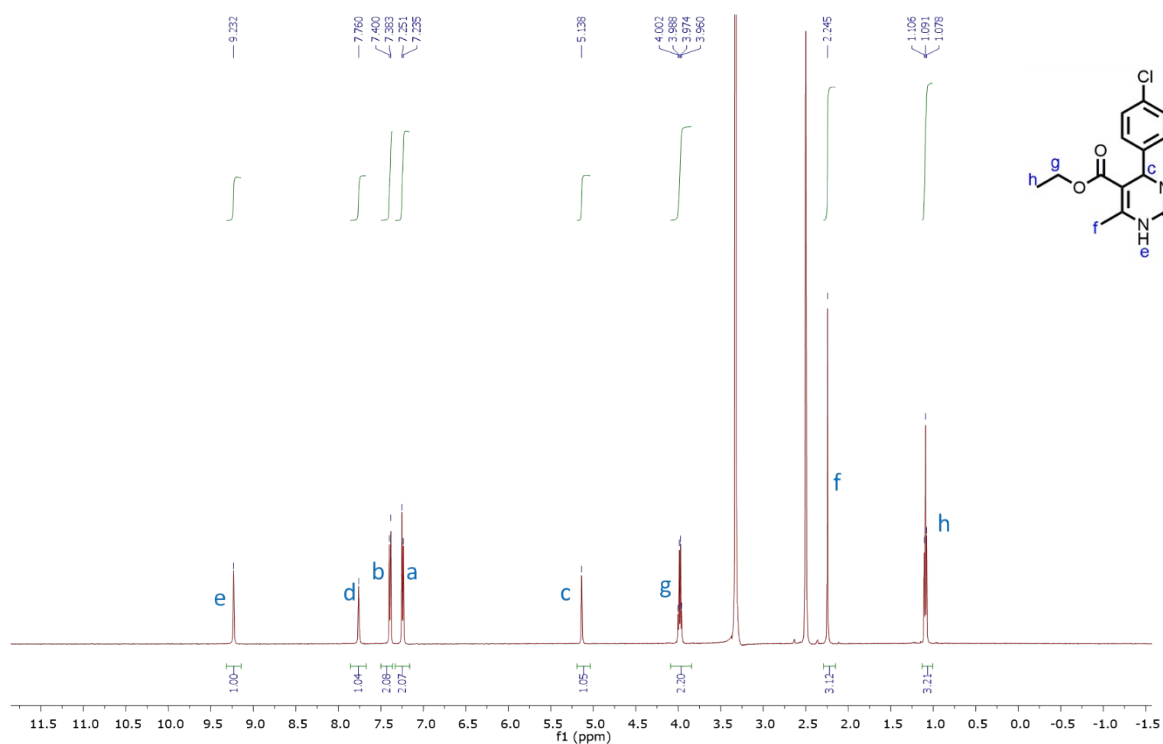

**$^1H$  NMR spectrum of 5d**

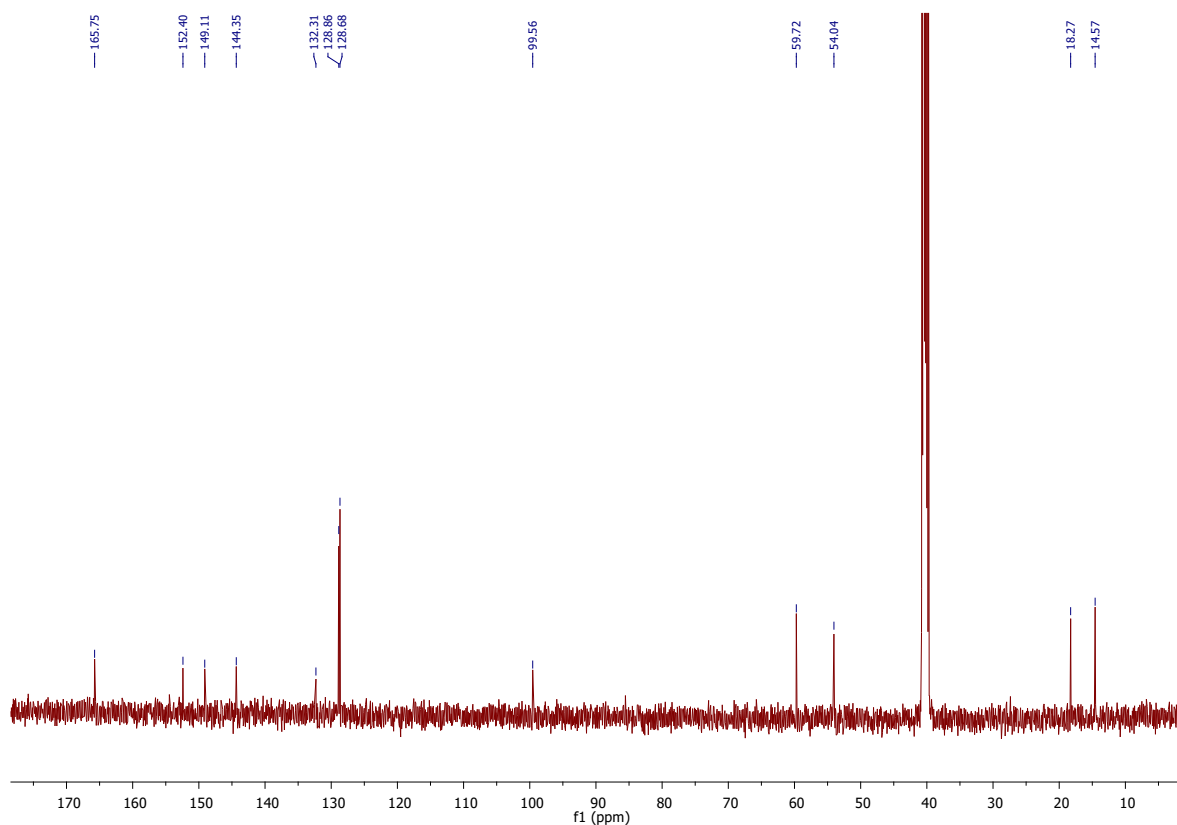

### $^{13}\text{C}$ NMR spectrum of 5d

### Ethyl-4-(3-bromophenyl)-6-methyl-2-oxo-1,2,3,4-tetrahydropyrimidine-5-carboxylate(5e)

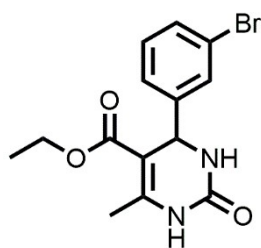

M.F.  $\text{C}_{14}\text{H}_{15}\text{N}_2\text{O}_4\text{Br}$  (339.19). Yield: (0.305 g, 90%). White powder.  $^1\text{H}$  NMR (500 MHz,  $\text{DMSO-d}_6$ , ppm)  $\delta$  9.26 (s, 1H, NH), 7.78 (s, 1H, NH), 7.45 (d,  $J = 7.5$  Hz 2H), 7.39 (s, 1H), 7.30 (t,  $J = 7.5$ , 1H), 7.23 (d,  $J = 7.5$ , 1H), 5.14 (s, 1H), 3.97-4.02 (m, 2H), 2.25 (s, 3H), 1.09 (t,  $J = 7.5$  Hz, 3H);  $^{13}\text{C}$  NMR (125 MHz,  $\text{DMSO-d}_6$ , ppm)  $\delta$  165.7, 152.4, 149.5, 148.0, 131.3, 130.7, 129.7, 125.8, 122.0, 99.1, 59.1, 18.3, 14.6

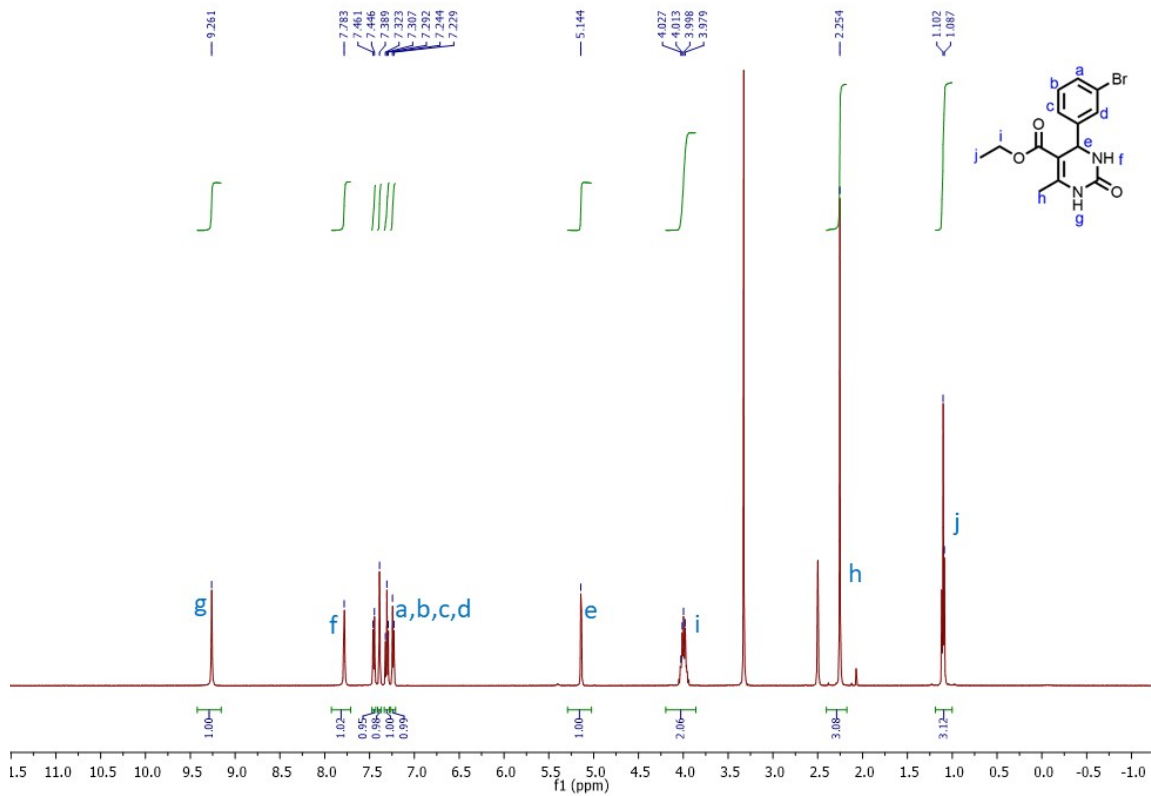

**<sup>1</sup>H NMR spectrum of 5e**

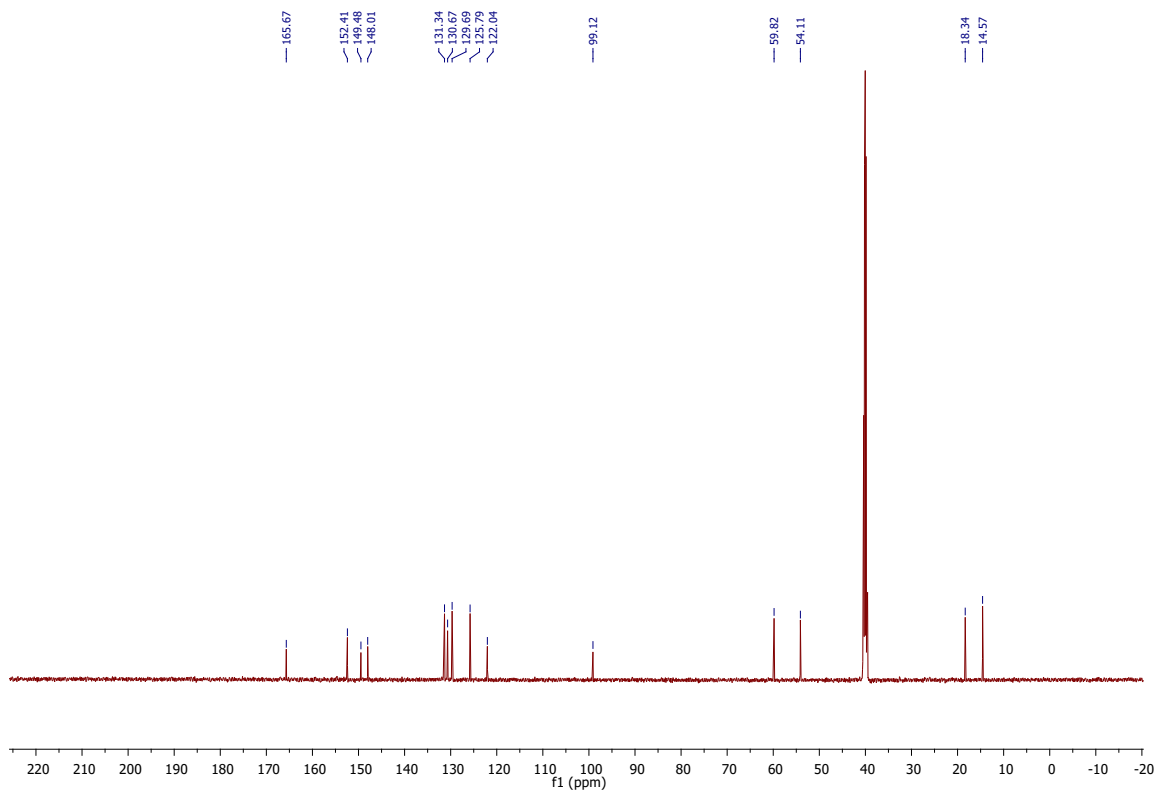

**<sup>13</sup>C NMR spectrum of 5e**

**Ethyl-6-methyl-4-(4-nitrophenyl)-2-oxo-1,2,3,4-tetrahydropyrimidine-5-carboxylate(5f)**

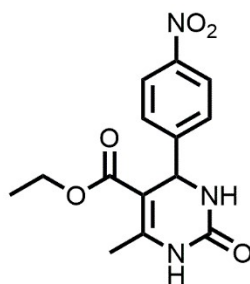

M.F.  $C_{14}H_{15}N_3O_5$  (305.29). Yield: (0.275 g, 90%). White powder.  $^1H$  NMR (500 MHz, DMSO- $d_6$ , ppm)  $\delta$  9.34 (s, 1H, NH), 8.21 (s, 1H, NH), 7.88 (s, 1H, NH), 7.50 (d,  $J = 8.5$  Hz 2H), 5.27 (d, 1H), 3.96 -4.00(m, 2H), 2.27 (s, 3H), 1.09 (t,  $J = 7.0$ Hz, 3H);  $^{13}C$  NMR (125 MHz, DMSO- $d_6$ , ppm)  $\delta$  165.6, 152.5, 152.3, 149.9, 147.2, 128.2, 124.3, 98.7, 59.9,54.2, 18.4, 14.6; HRMS (ESI): calcd. for  $C_{14}H_{15}N_3O_5$   $[M + H]^+$ 306.109, found 306.109.

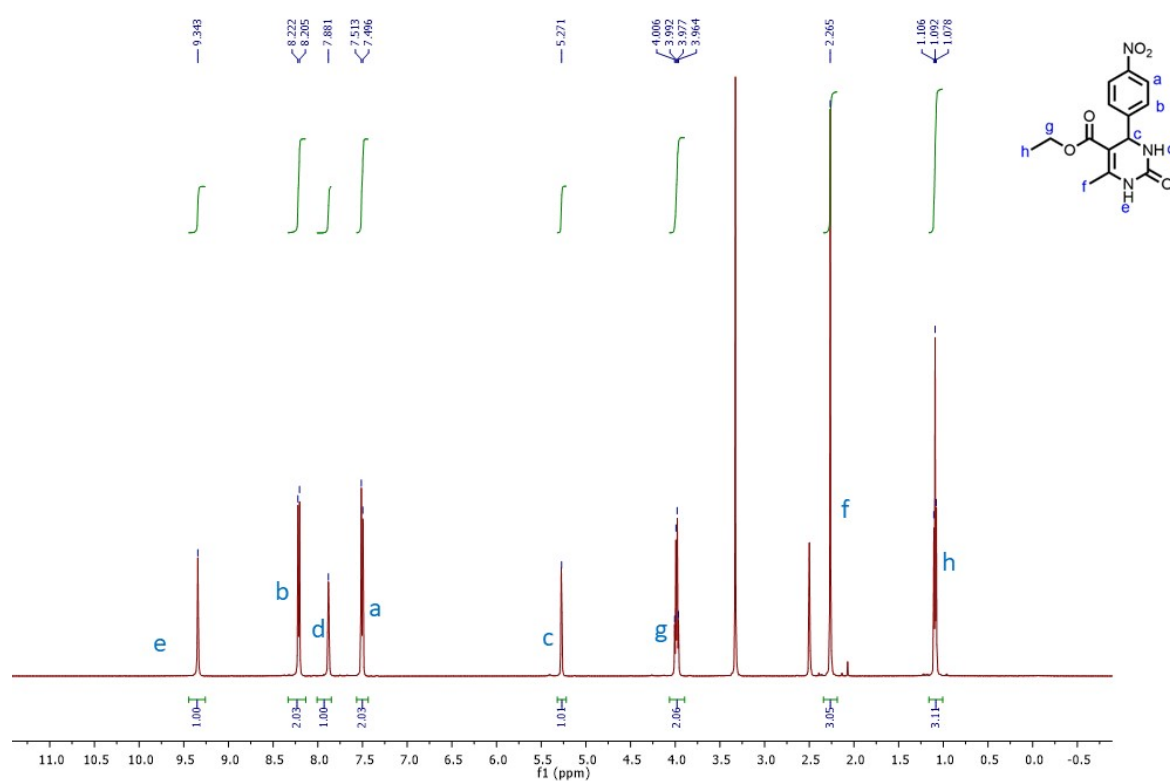

$^1H$  NMR spectrum of 5f

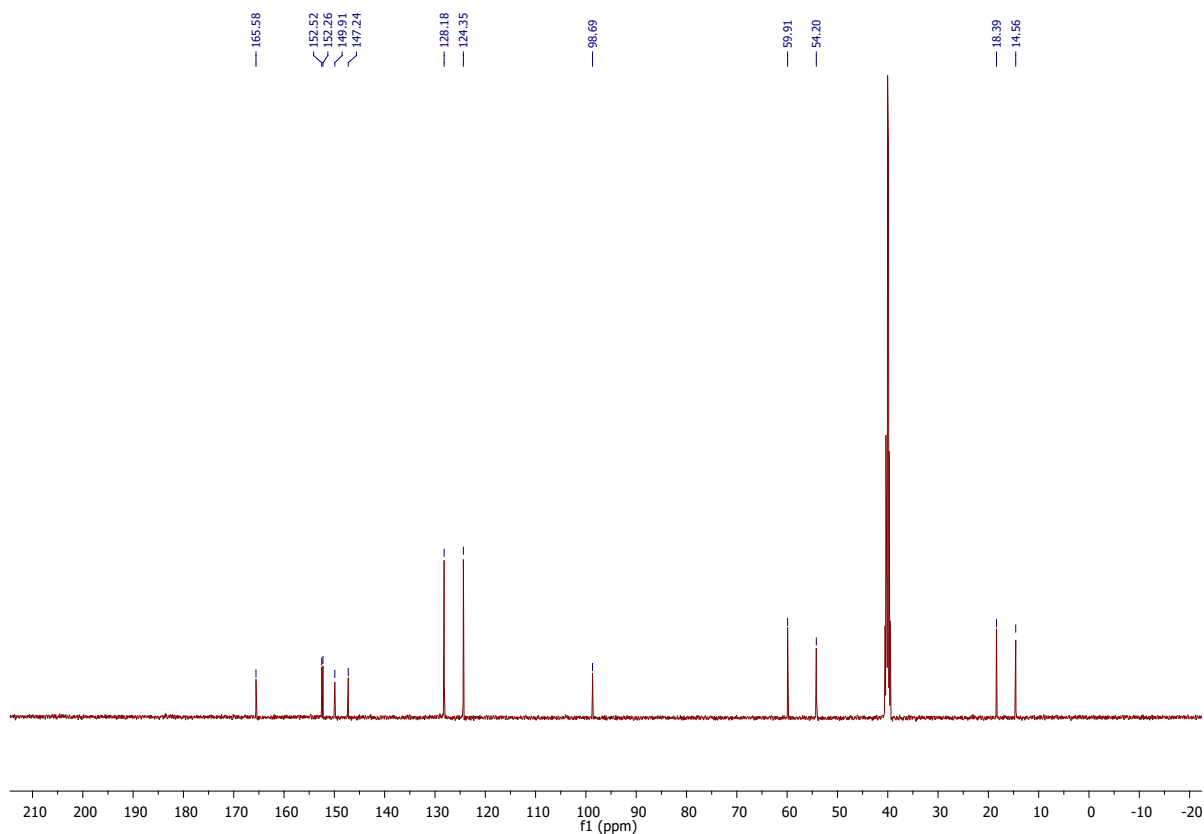

$^{13}\text{C}$  NMR spectrum of **5f**

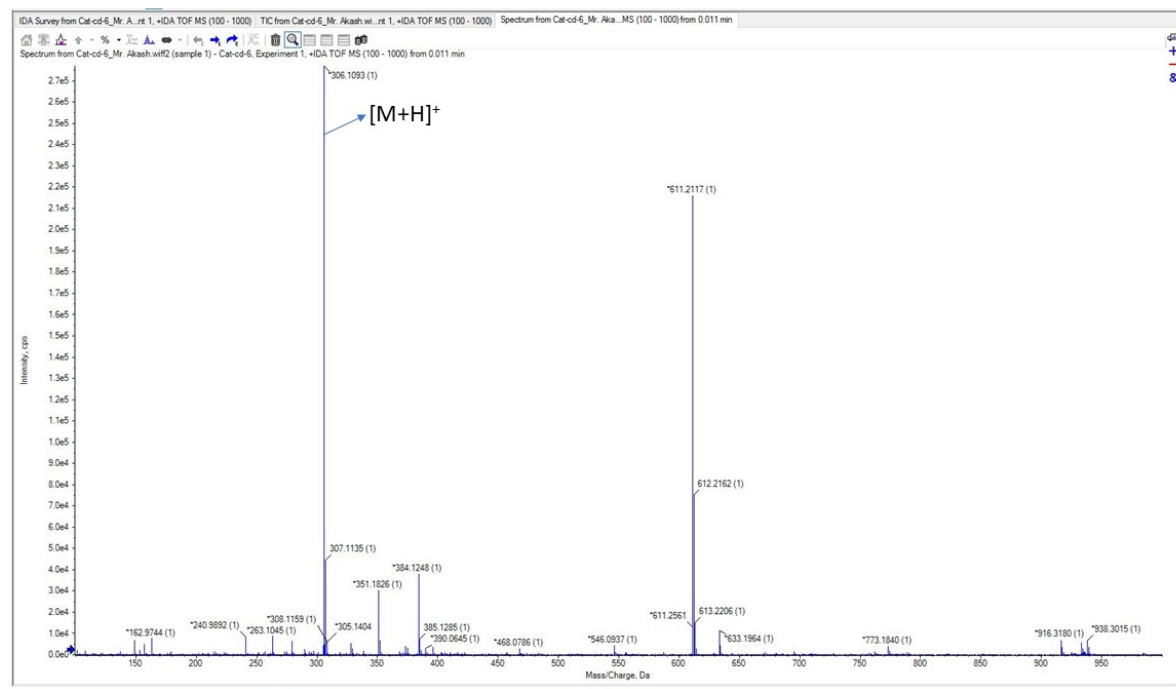

HRMS spectrum of **5f**

**Ethyl-4-(4-(benzyloxy)phenyl)-6-methyl-2-oxo-1,2,3,4-tetrahydropyrimidine-5-carboxylate(5g)**

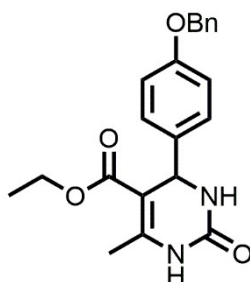

M.F.  $C_{21}H_{22}N_2O_4$  (366.42). Yield: (0.325 g, 89%). White powder.  $^1H$  NMR (500 MHz, DMSO- $d_6$ , ppm)  $\delta$  9.15 (s, 1H, NH), 7.66 (s, 1H, NH), 7.38-7.42(5H), 7.14-7.15(2H), 6.96(2H) 5.08 (3H), 3.98 (m, 2H), 2.24 (s, 3H), 1.09 (3H);  $^{13}C$  NMR (125 MHz, DMSO- $d_6$ , ppm)  $\delta$  165.9, 158.0, 152.6, 148.5, 137.8, 137.6, 128.9, 128.3, 128.1, 127.9, 115.1, 100.0, 69.7, 59.7, 53.8, 18.3, 14.6; HRMS (ESI): calcd. for  $C_{21}H_{22}N_2O_4$   $[M + H]^+$  367.166, found 367.167.

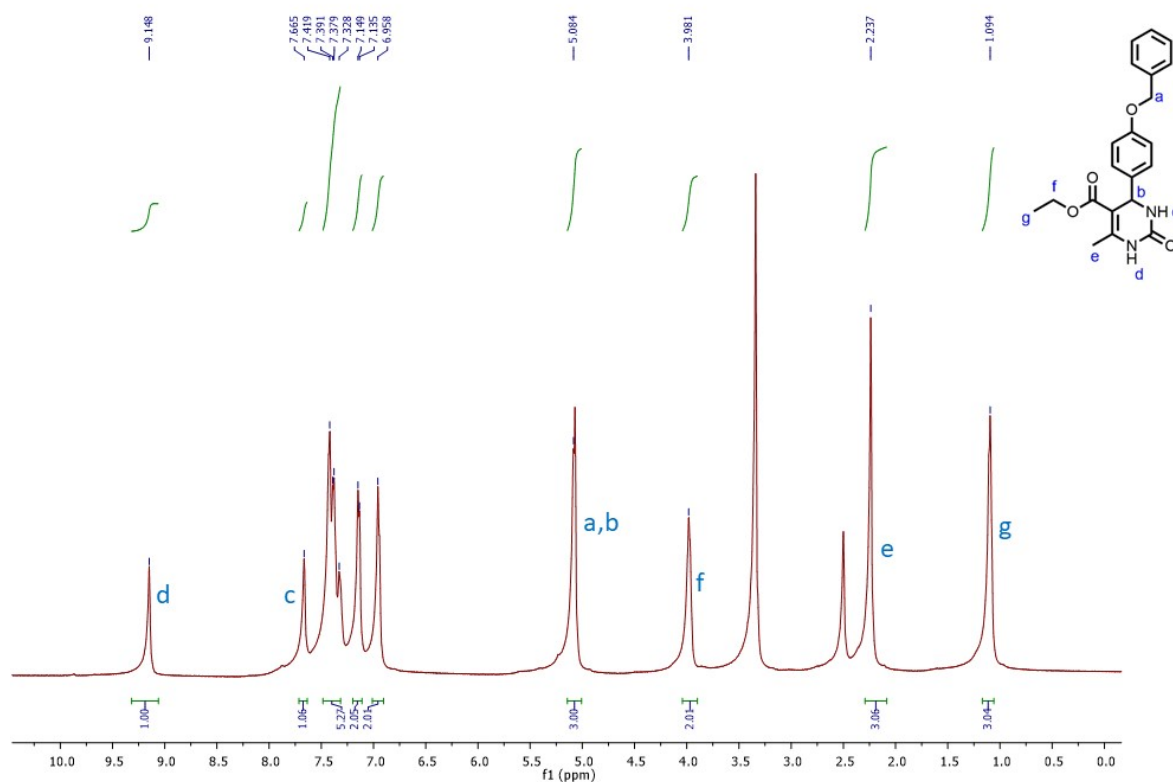

**$^1H$  NMR spectrum of 5g**

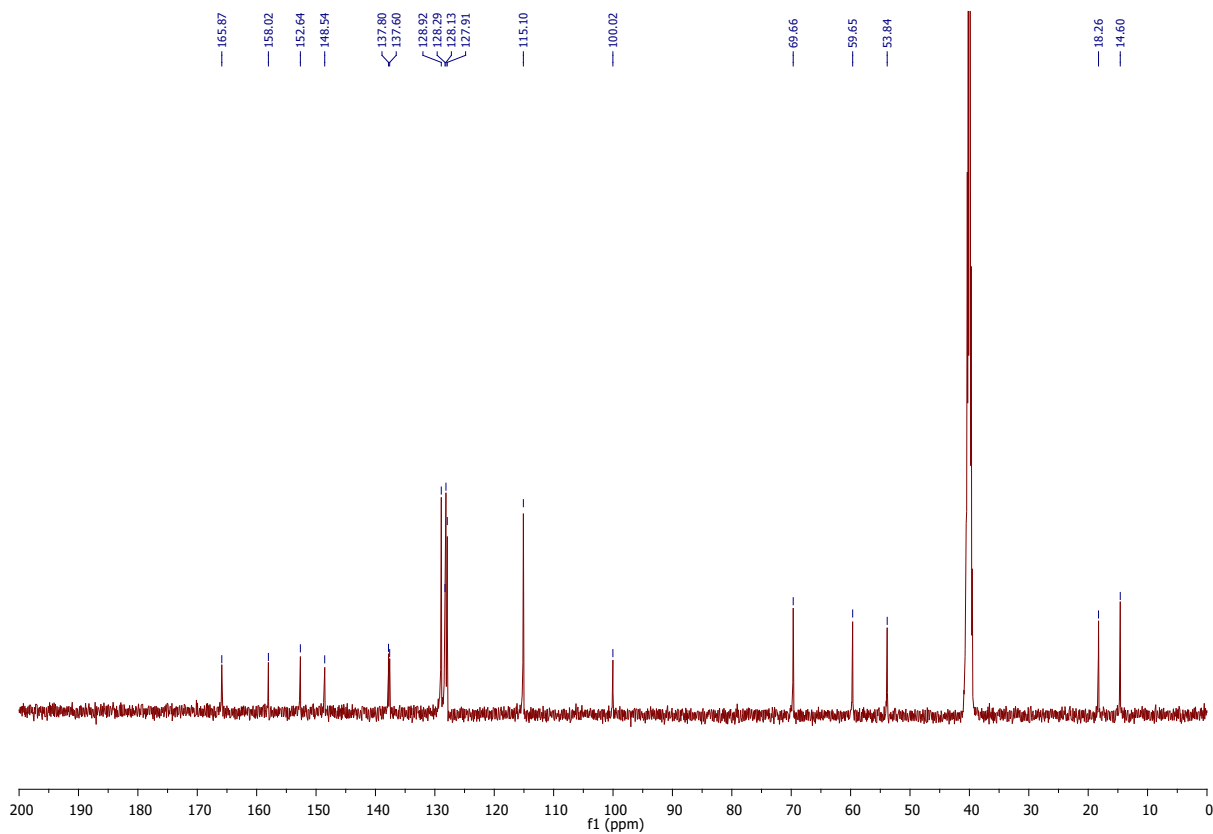

**$^{13}\text{C}$  NMR spectrum of 5g**

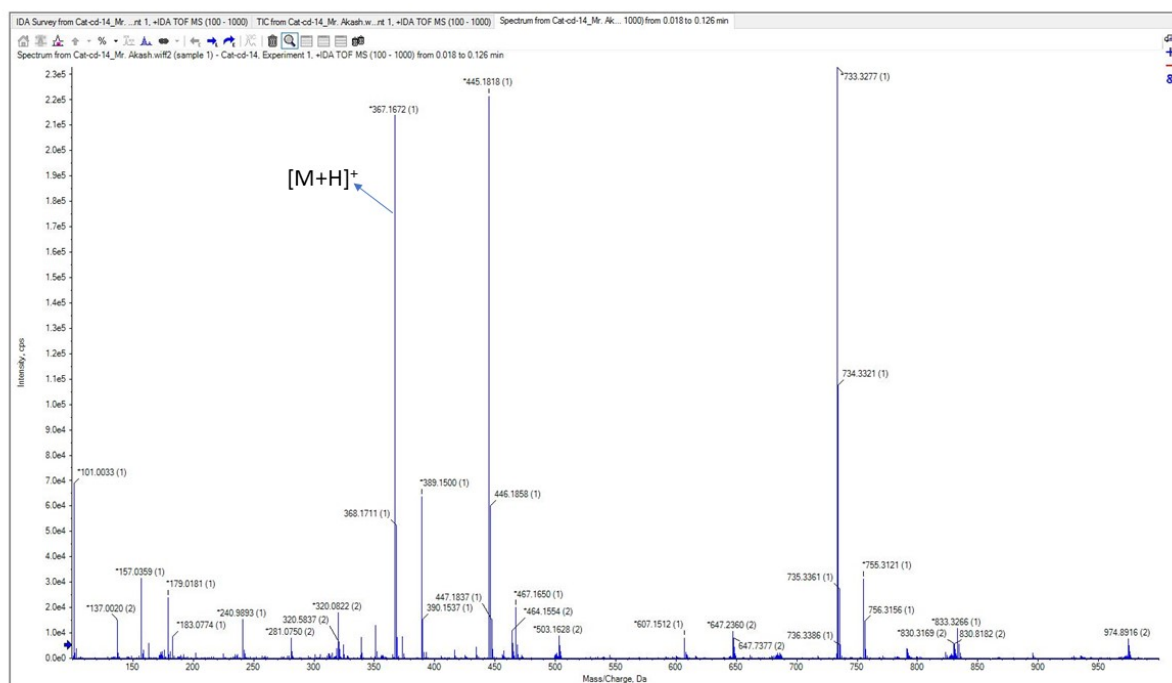

**HRMS spectrum of 5g**

## Ethyl-6-methyl-2-oxo-4-phenethyl-1,2,3,4-tetrahydropyrimidine-5-carboxylate(5h)

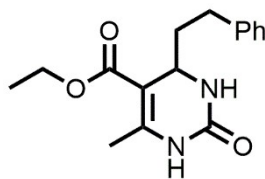

M.F. C<sub>16</sub>H<sub>20</sub>N<sub>2</sub>O<sub>3</sub> (288.35). Yield: (0.250 g, 87%). White powder. <sup>1</sup>H NMR (500 MHz, DMSO-d<sub>6</sub>, ppm) δ 9.01 (s, 1H, NH), 7.51 (s, 1H, NH), 7.25 (t, J = 7 Hz 2H), 7.13-7.19(m, 3H), 4.08(m, 1H), 4.00(m, 2H), 2.64 (m, 2H), 2.16(s, 3H), 1.70(m, 2H), 1.10(t, J = 7.0Hz, 3H); <sup>13</sup>C NMR (125 MHz, DMSO-d<sub>6</sub>, ppm) δ 165.8, 153.3, 149.1, 142.1, 128.8, 126.2, 99.7, 59.5, 50.3, 39.0, 30.5, 18.2, 14.6; HRMS (TOF-MS): calcd. for C<sub>16</sub>H<sub>20</sub>N<sub>2</sub>O<sub>3</sub> m/z [M + H]<sup>+</sup>289.155, found 289.156.

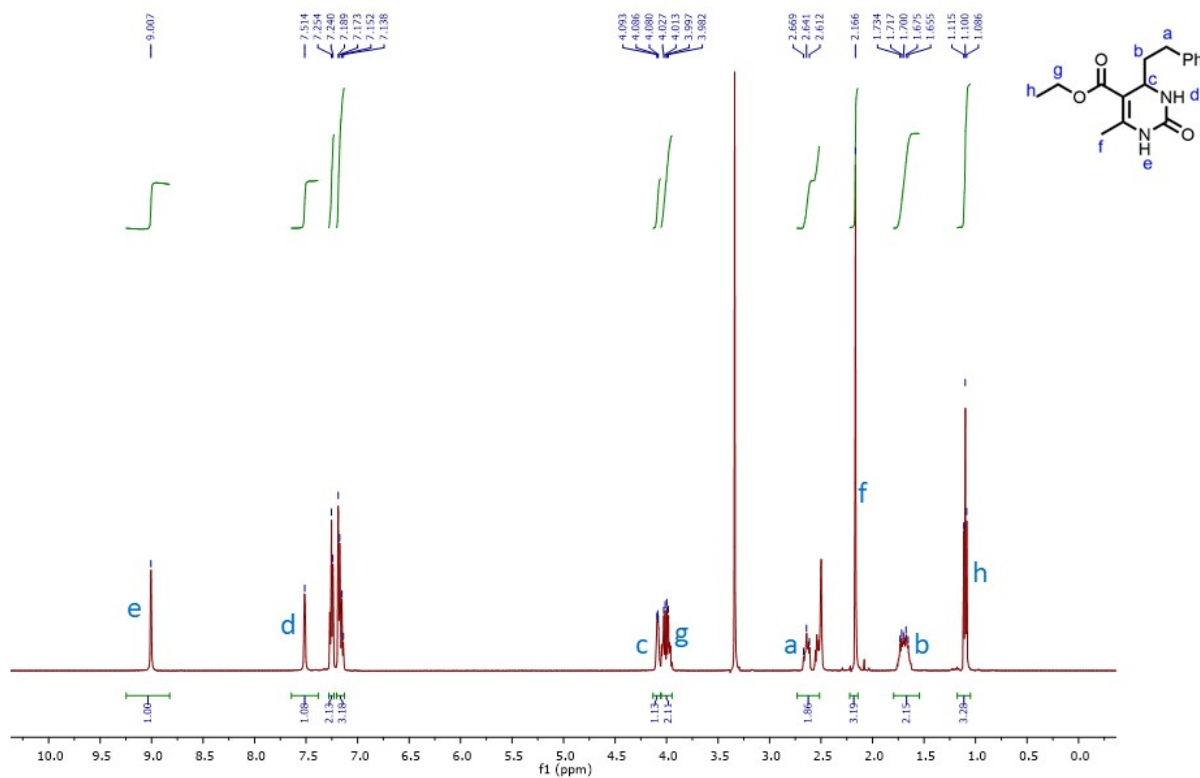

<sup>1</sup>H NMR spectrum of 5h



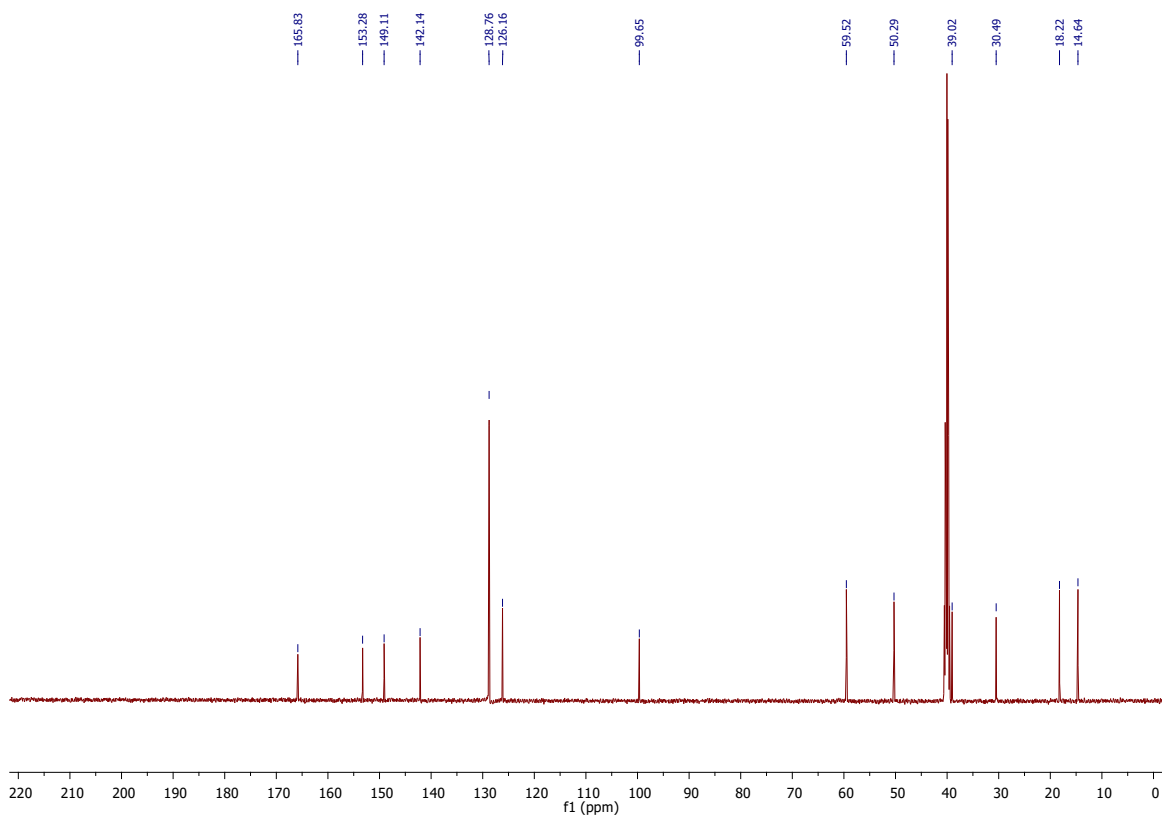

**$^{13}\text{C}$  NMR spectrum of 5h**

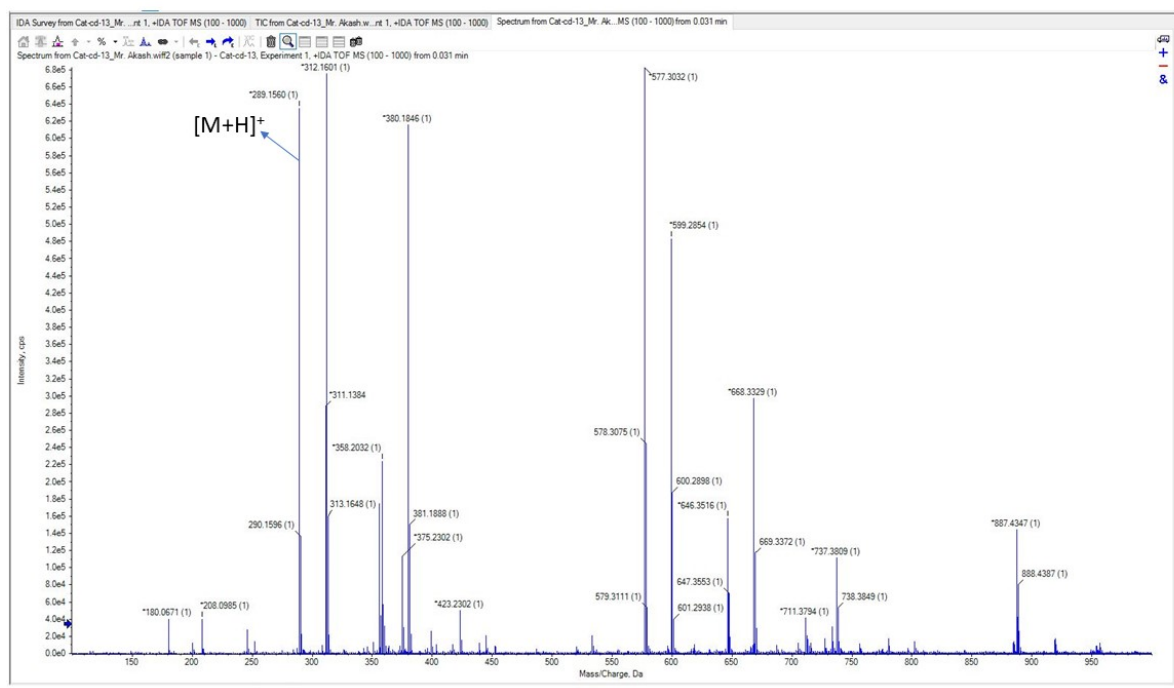

**HRMS spectrum of 5h**

**Ethyl4-(3-methoxyphenyl)-6-methyl-2-oxo-1,2,3,4-tetrahydropyrimidine-5-carboxylate(5i)**

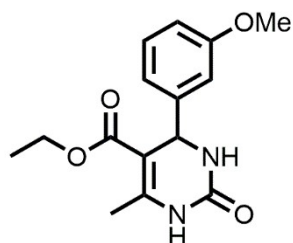

M.F. C<sub>15</sub>H<sub>18</sub>N<sub>2</sub>O<sub>4</sub> (290.32). Yield: (0.267 g, 92%). White powder. <sup>1</sup>H NMR (500 MHz, DMSO-d<sub>6</sub>, ppm) δ 9.18 (s, 1H, NH), 7.72 (s, 1H, NH), 7.24 (t, J = 7.5Hz, 1H), 6.81 (d, J = 7.5Hz, 2H), 6.78 (d, 1H), 5.12 (d, J = 6 Hz, 1H), 3.98 -4.01 (m, 2H), 3.72 (s, 3H), 2.24 (s, 3H), 1.11 (t, J = 7.0Hz, 3H); <sup>13</sup>C NMR (125 MHz, DMSO-d<sub>6</sub>, ppm) δ 165.9, 159.7, 152.7, 148.9, 146.9, 130.1, 118.7, 112.9, 112.6, 99.6, 59.7, 55.4, 54.2, 18.3, 14.6.

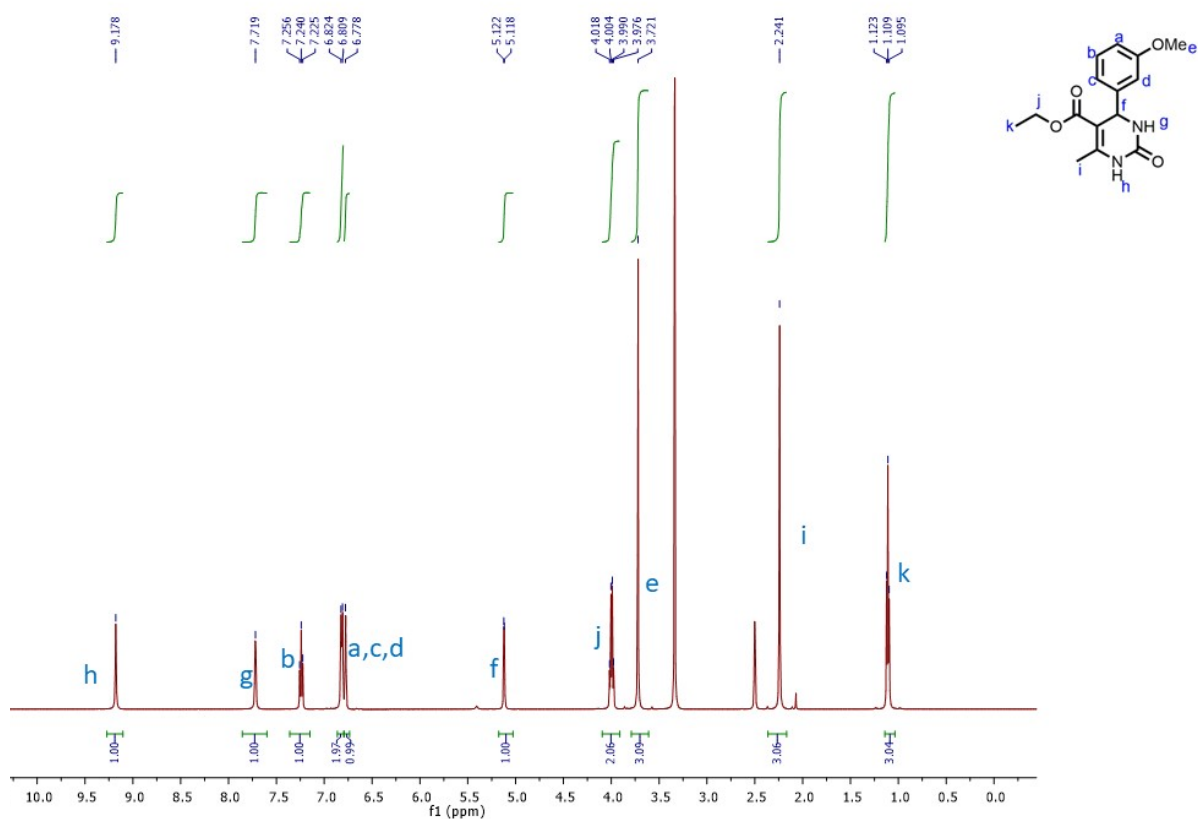

<sup>1</sup>H NMR spectrum of 5i

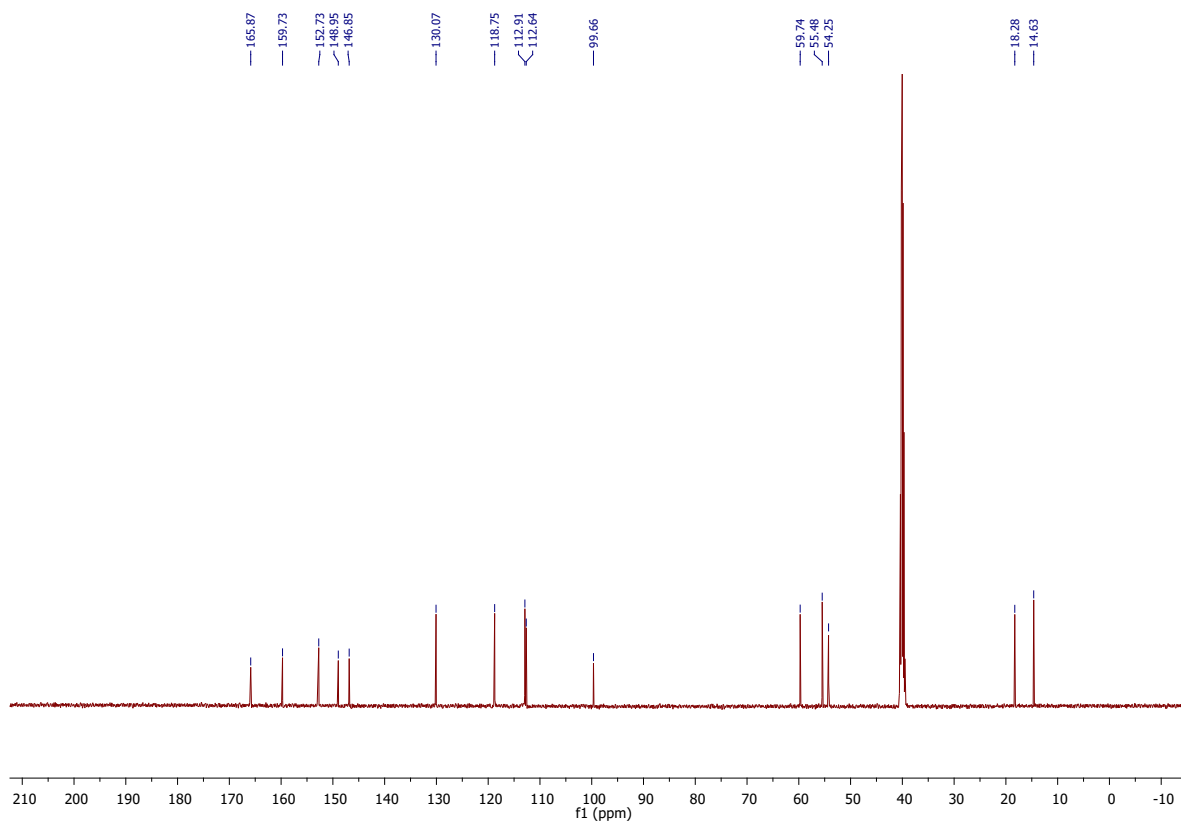

**<sup>13</sup>C NMR spectrum of 5i**

**Ethyl 6-methyl-2-oxo-4-(thiophen-2-yl)-1,2,3,4-tetrahydropyrimidine-5-carboxylate(5j)**

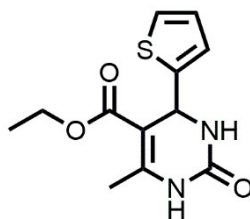

M.F. C<sub>12</sub>H<sub>14</sub>N<sub>2</sub>O<sub>3</sub>S (266.32). Yield: (0.239 g, 90%). White powder. <sup>1</sup>H NMR (500 MHz, DMSO-d<sub>6</sub>, ppm) δ 9.31 (s, 1H, NH), 7.90 (s, 1H, NH), 7.35 (d, J = 4.5 Hz, 1H), 6.94 (t, J = 4.5 Hz, 1H), 6.89 (d, 1H), 5.40(d, 1H), 4.04 -4.08 (m, 2H), 2.22 (s, 3H), 1.16 (t, J= 7.0Hz, 3H); <sup>13</sup>C NMR (125 MHz, DMSO-d<sub>6</sub>, ppm) δ 165.5, 152.8, 149.3, 149.2, 127.2, 125.2, 124.0, 100.3, 59.9, 49.9, 18.2, 14.6.

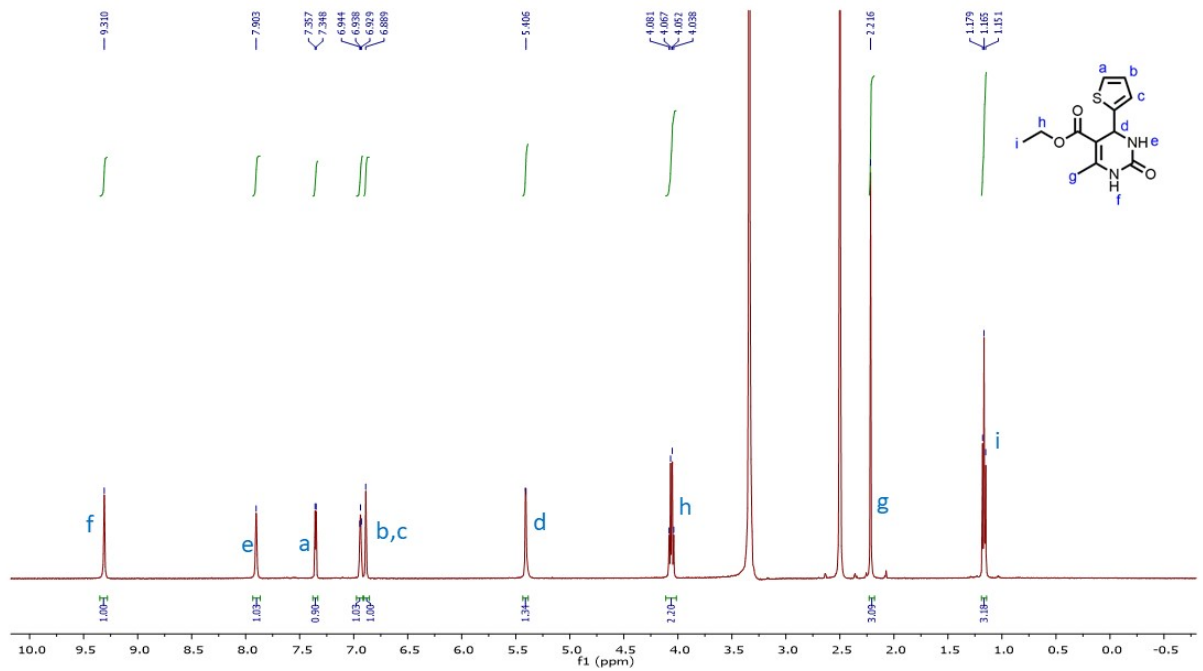

**<sup>1</sup>H NMR spectrum of 5j**

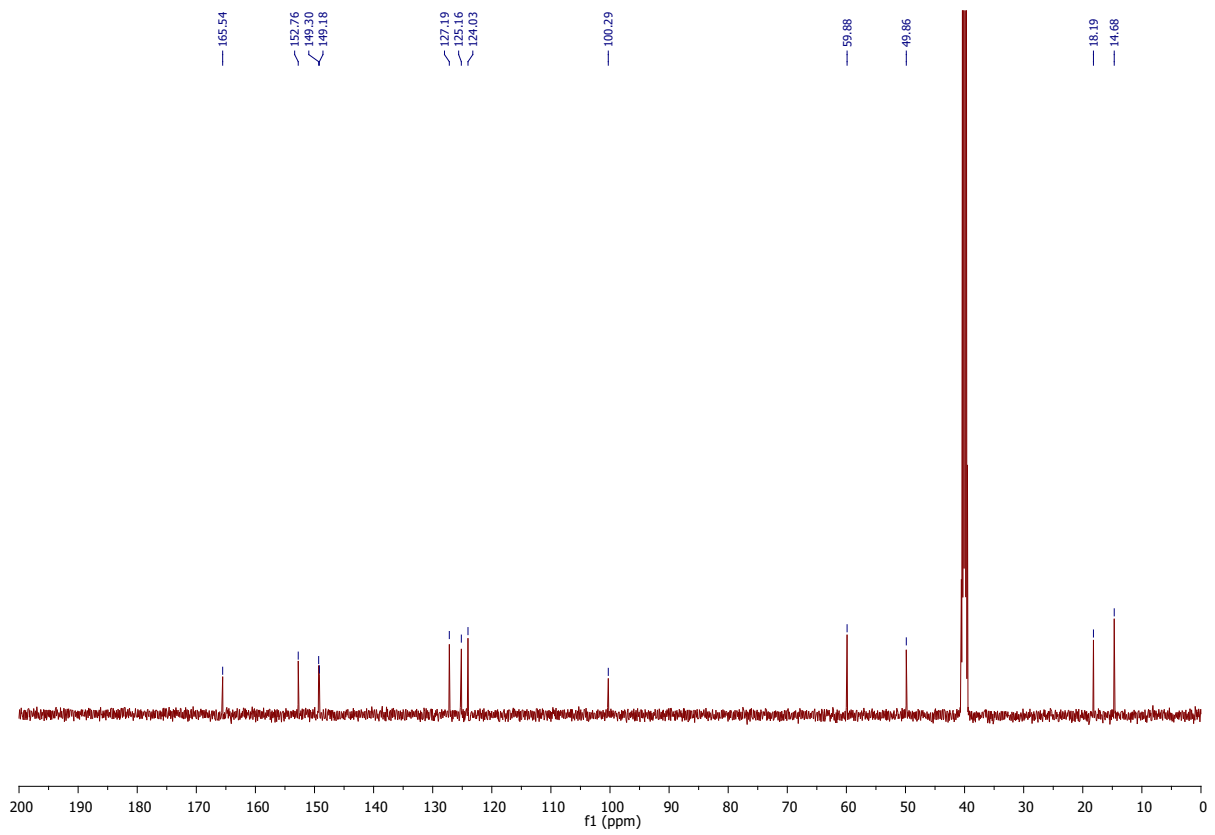

**<sup>13</sup>C NMR spectrum of 5j**

**Ethyl-6-methyl-2-oxo-4-(3,4,5-trimethoxyphenyl)-1,2,3,4-tetrahydropyrimidine-5-carboxylate(5k)**

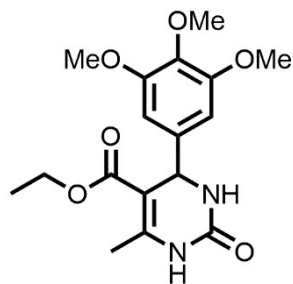

M.F. C<sub>17</sub>H<sub>22</sub>N<sub>2</sub>O<sub>6</sub> (350.37). Yield: (0.318 g, 91%). White powder. <sup>1</sup>H NMR (500 MHz, DMSO-d<sub>6</sub>, ppm) δ 9.14 (s, 1H, NH), 7.66 (s, 1H, NH), 6.48 (s, 2H), 5.07 (d, 1H), 3.97 - 4.00(m, 2H), 3.68 (s, 6H), 3.58 (s, 3H), 2.20 (s, 3H), 1.09 (t, J = 7.0Hz, 3H); <sup>13</sup>C NMR (125 MHz, DMSO-d<sub>6</sub>, ppm) δ 165.6, 152.7, 143.2, 130.1, 127.6, 123.7, 103.4, 103.0, 69.1, 59.9 55.8, 53.8, 18.3, 14.2.

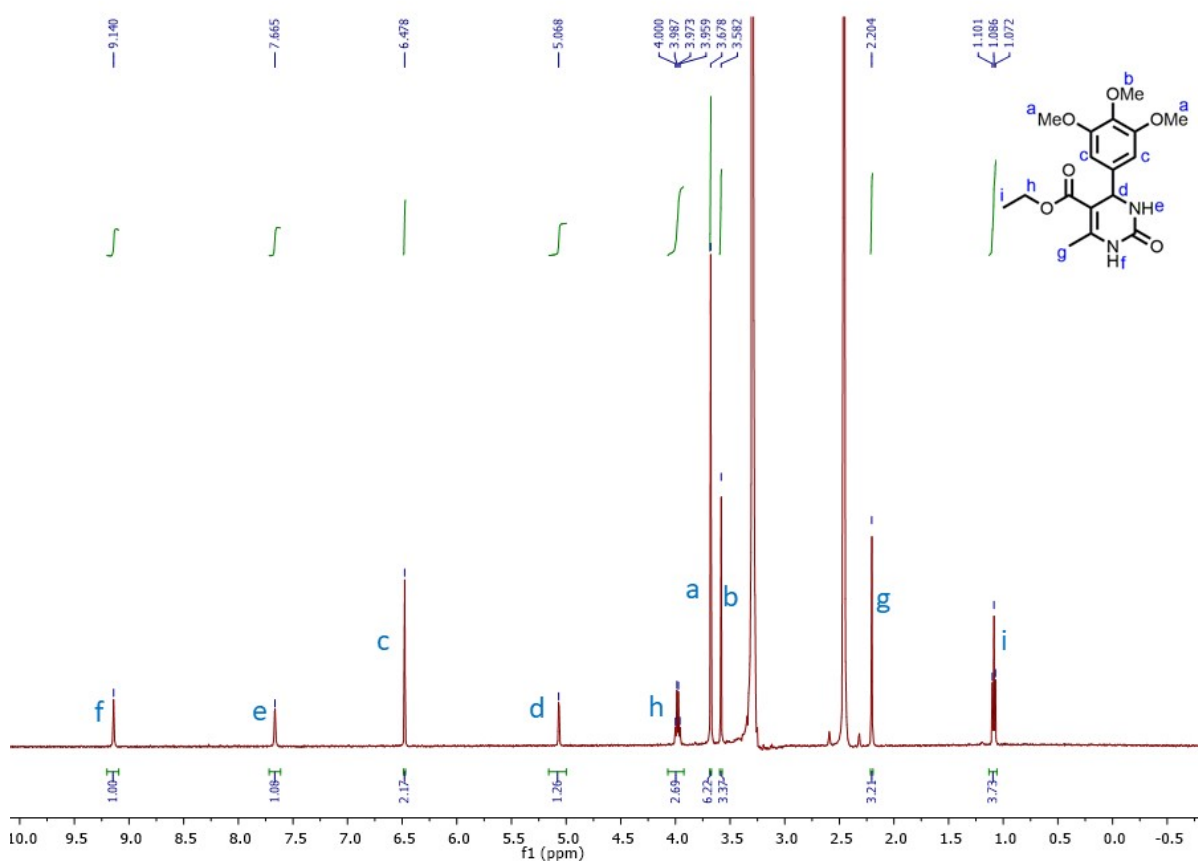

**<sup>1</sup>H NMR spectrum of 5k**

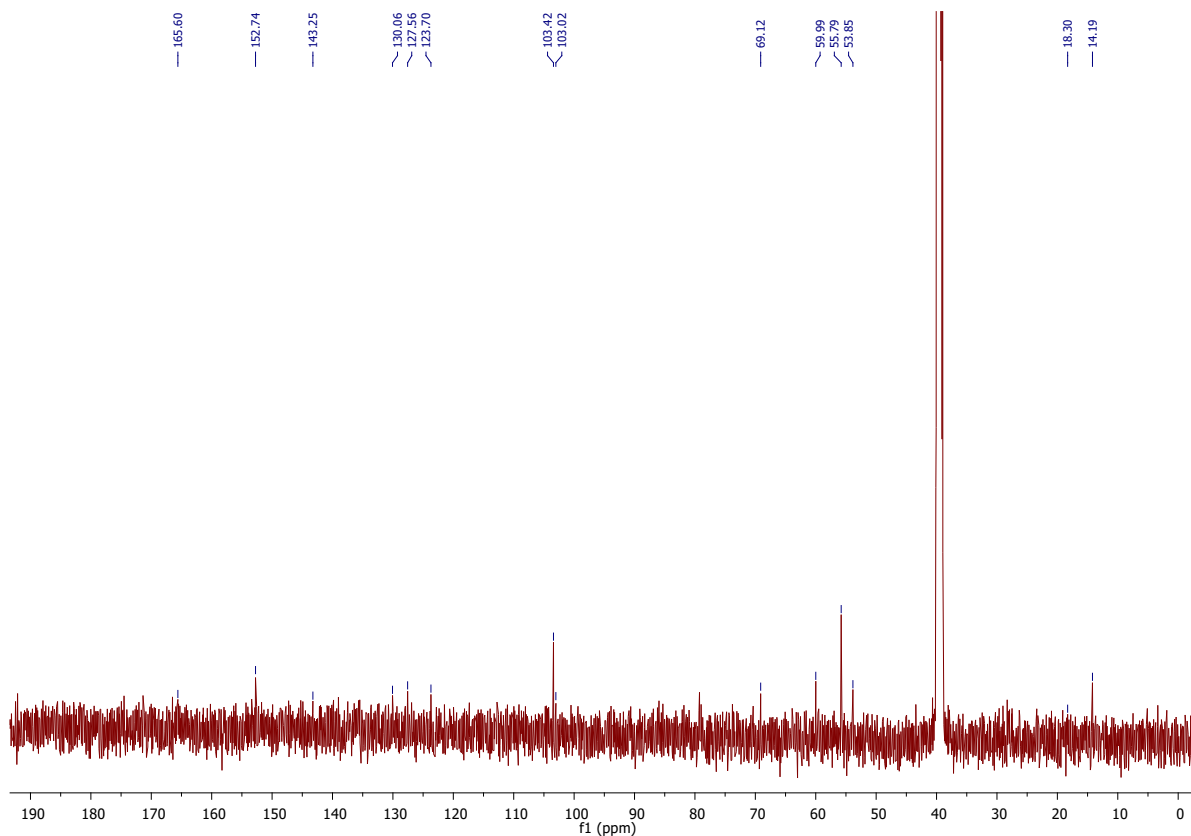

### <sup>13</sup>C NMR spectrum of 5k

### Ethyl-6-methyl-4-(naphthalen-2-yl)-2-oxo-1,2,3,4-tetrahydropyrimidine-5-carboxylate(5l)

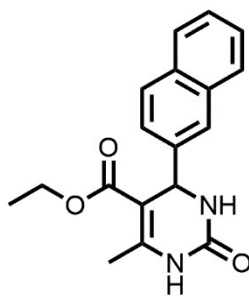

M.F. C<sub>18</sub>H<sub>18</sub>N<sub>2</sub>O<sub>3</sub> (310.35). Yield: (0.273 g, 88%). White powder. <sup>1</sup>H NMR (500 MHz, DMSO-d<sub>6</sub>, ppm) δ 9.27 (s, 1H, NH), 8.31 (d, J = 8.5 Hz 1H), 7.94 (d, J = 8.0 Hz, 1H), 7.84 (d, J = 8.0 Hz, 1H), 7.77 (s, 1H, NH), 7.52-7.59 (m, 2H), 7.48 (t, J = 7.5 Hz, 1H), 7.42 (d, J = 7.0 Hz, 1H) 6.07 (s, 1H), 3.74 -3.85 (m, 2H), 2.37 (s, 3H), 0.81 (t, J= 7.0 Hz, 3H); <sup>13</sup>C NMR (125 MHz, DMSO-d<sub>6</sub>, ppm) δ 165.3, 151.7, 148.7, 140.4, 133.5, 128.5, 127.9, 126.1, 125.5, 125.3, 124.2, 123.7, 99.2, 59.0,49.8, 17.8, 13.8.

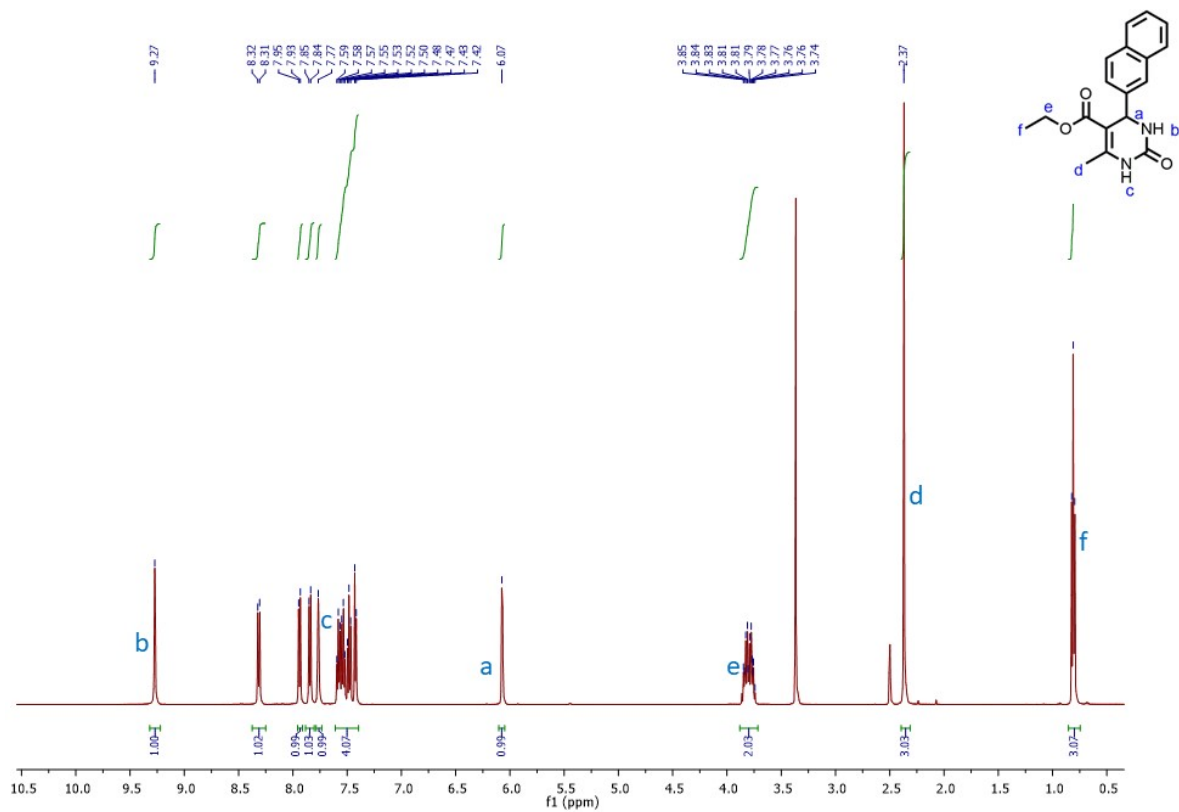

**<sup>1</sup>H NMR spectrum of 51**

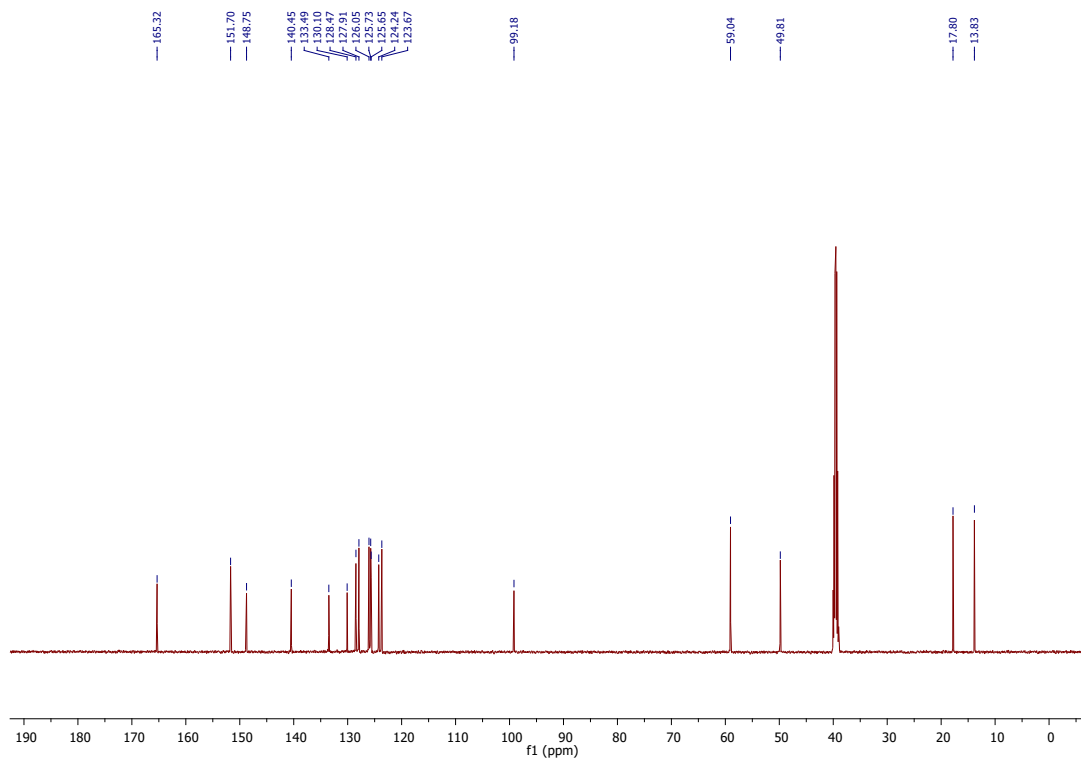

**<sup>13</sup>C NMR spectrum of 51**

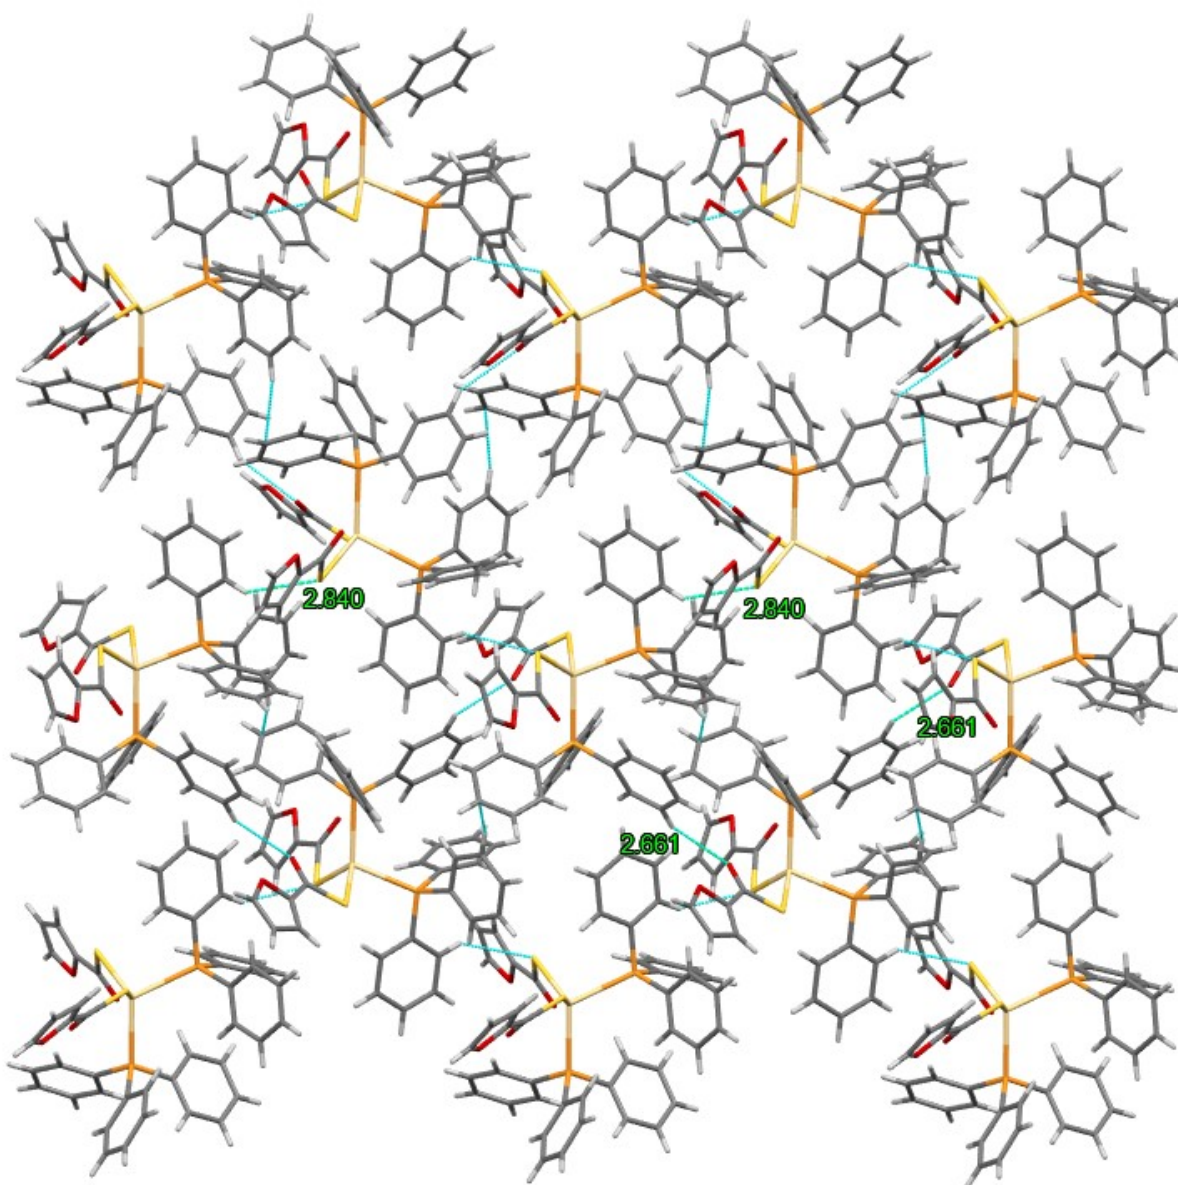

**Figure S1.** Packing diagram of **1** showing C-H $\cdots$ O and C-H $\cdots$ S interactions (green dotted line).



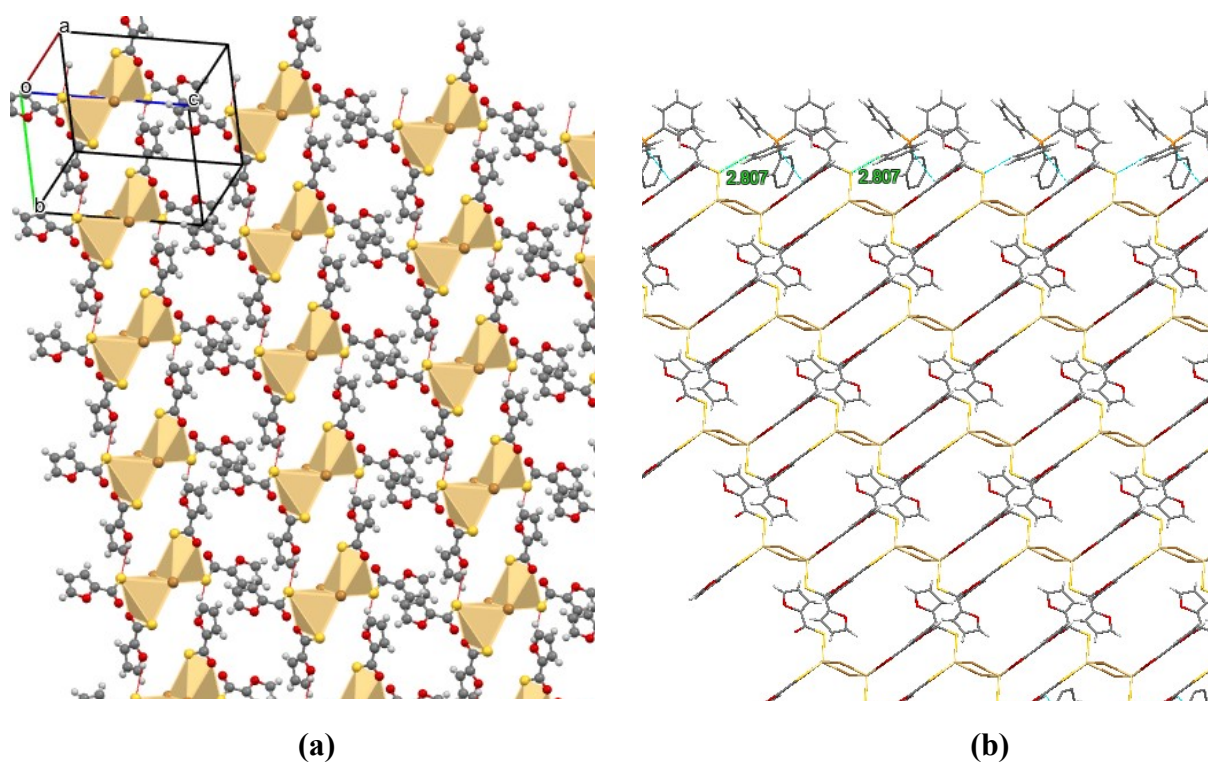

**Figure S2.** Packing diagrams of **2** (a) showing square pyramidal polyhedra along the *b*, *c* plane and (b) showing C-H...O and C-H...S interactions (green dotted lines).

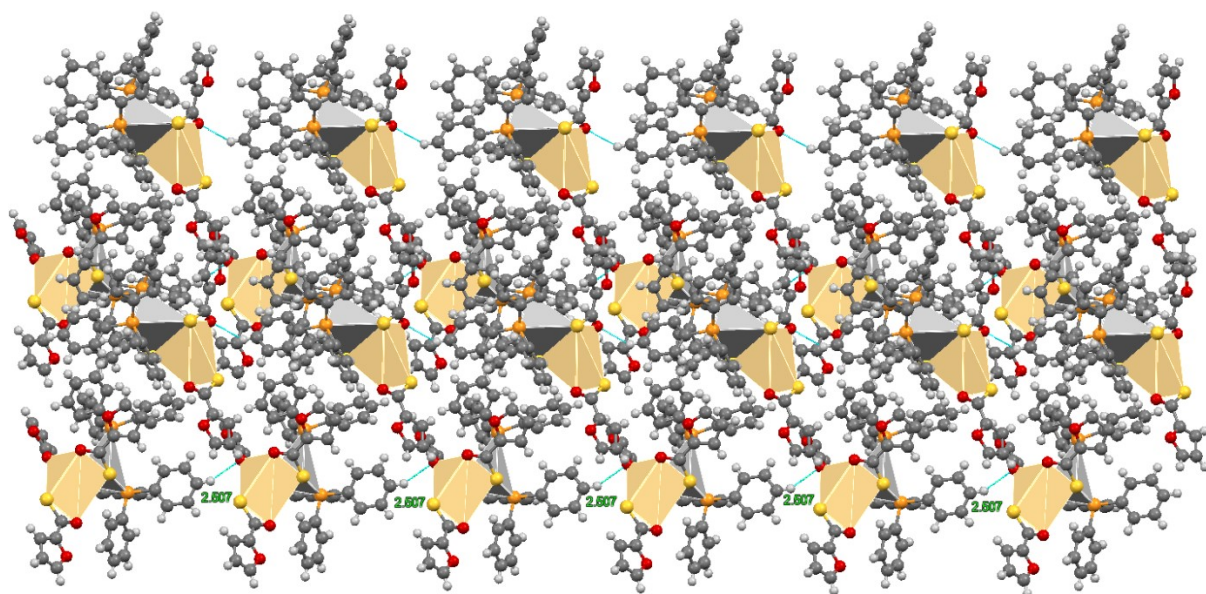

**Figure S3.** Packing diagram of **3** showing polyhedral core around the Cd(II) (trigonal prismatic) and Ag(I) (distorted tetrahedral) along with C-H...O hydrogen bonds.

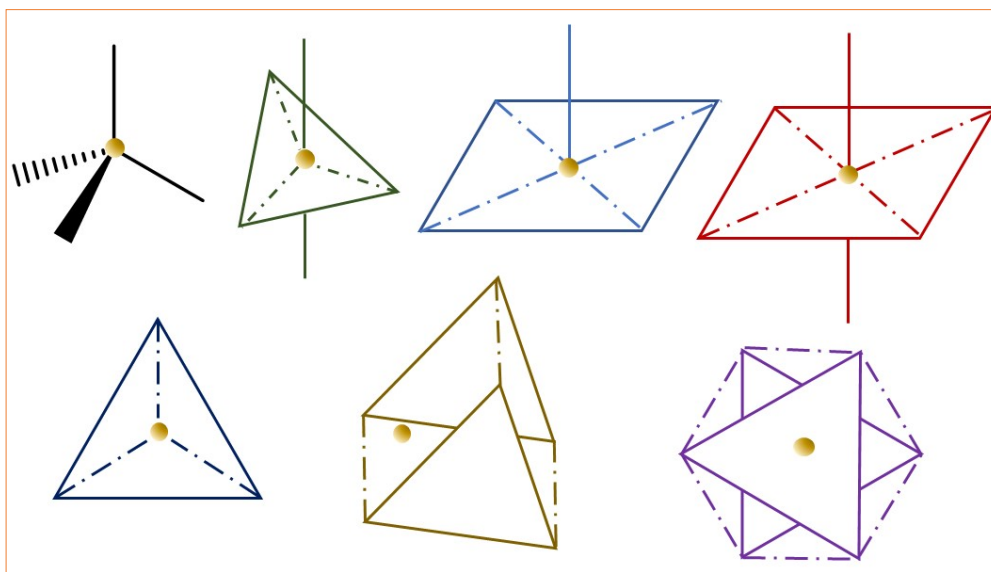

**Figure S4.** Earlier reported geometries of Cd(II) complexes. The above-given geometries of Cd(II) complexes are in their usual meaning.

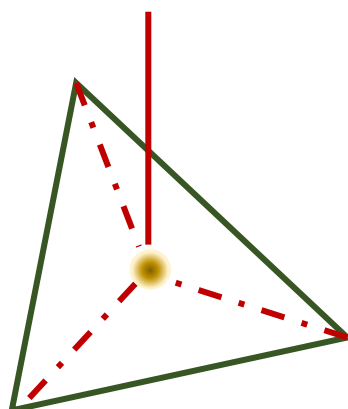

**Figure S5.** The above figure illustrates the trigonal pyramidal geometry of Cd(II) thiocarboxylate complex.
